# Supplementary material for: Insight into the mechanism of decarbonylation of methanol by ruthenium complexes; a deuterium labelling study
Source: Royal Society of Chemistry journal article supplement (doi:10.1039/c8dt01733f), 2018-01-01
Supplement: c8dt01733f1.pdf [file c8dt01733f1.pdf]

# Insight into the mechanism of decarbonylation of methanol by ruthenium complexes; a deuterium labelling study

ESI

## Contents

|   |                                                                                                                    |    |
|---|--------------------------------------------------------------------------------------------------------------------|----|
| 1 | NMR spectra .....                                                                                                  | 1  |
| 2 | Evidence for <i>o</i> -D incorporation into coordinated PPh <sub>3</sub> .....                                     | 31 |
| 3 | Hydride composition for the final product from reaction of [RuHClP <sub>3</sub> ] with Na/CD <sub>3</sub> OD ..... | 33 |

## 1 NMR spectra

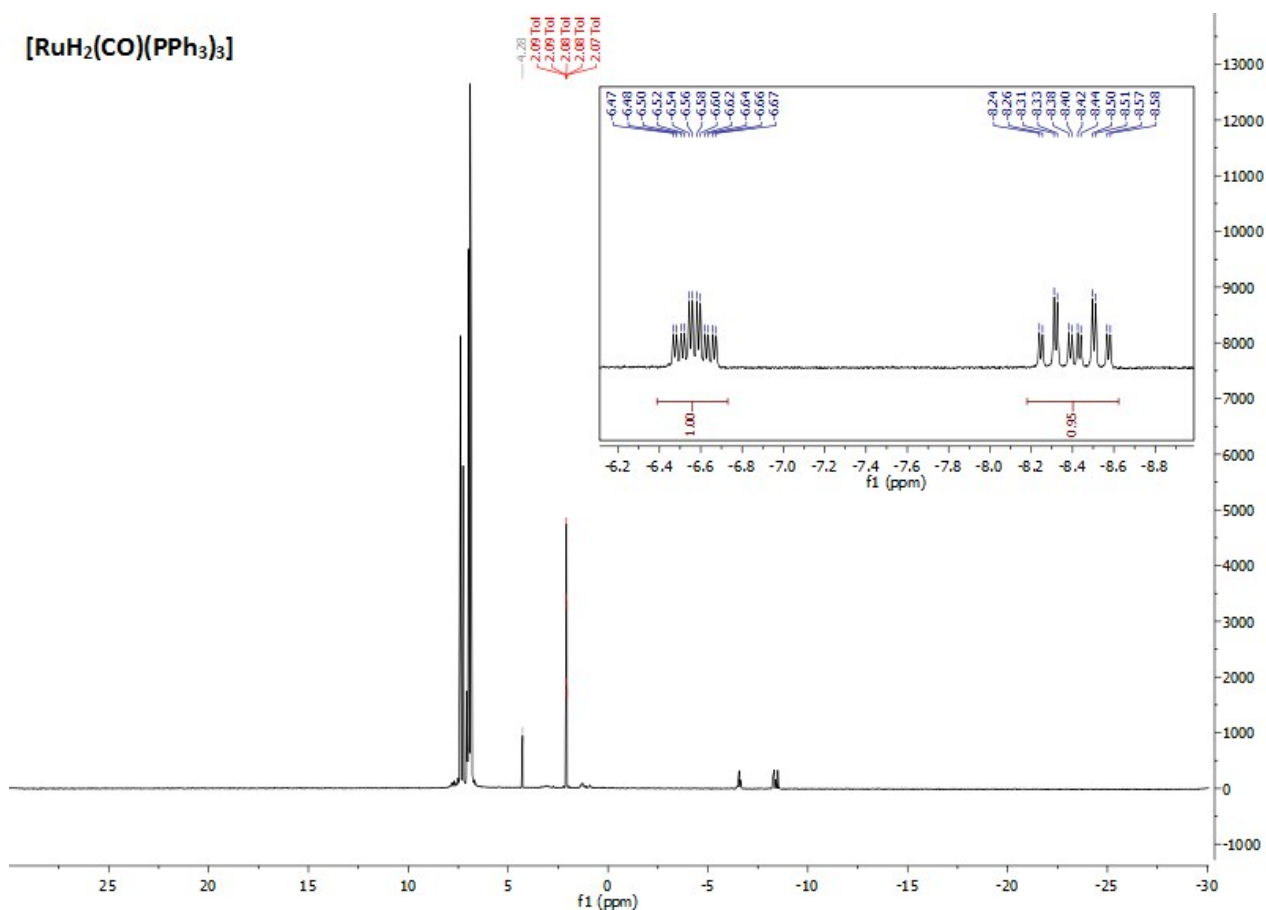

**Figure S1** <sup>1</sup>H NMR (400 MHz; toluene-*d*<sub>8</sub>) of [RuH<sub>2</sub>(CO)(PPh<sub>3</sub>)<sub>3</sub>]

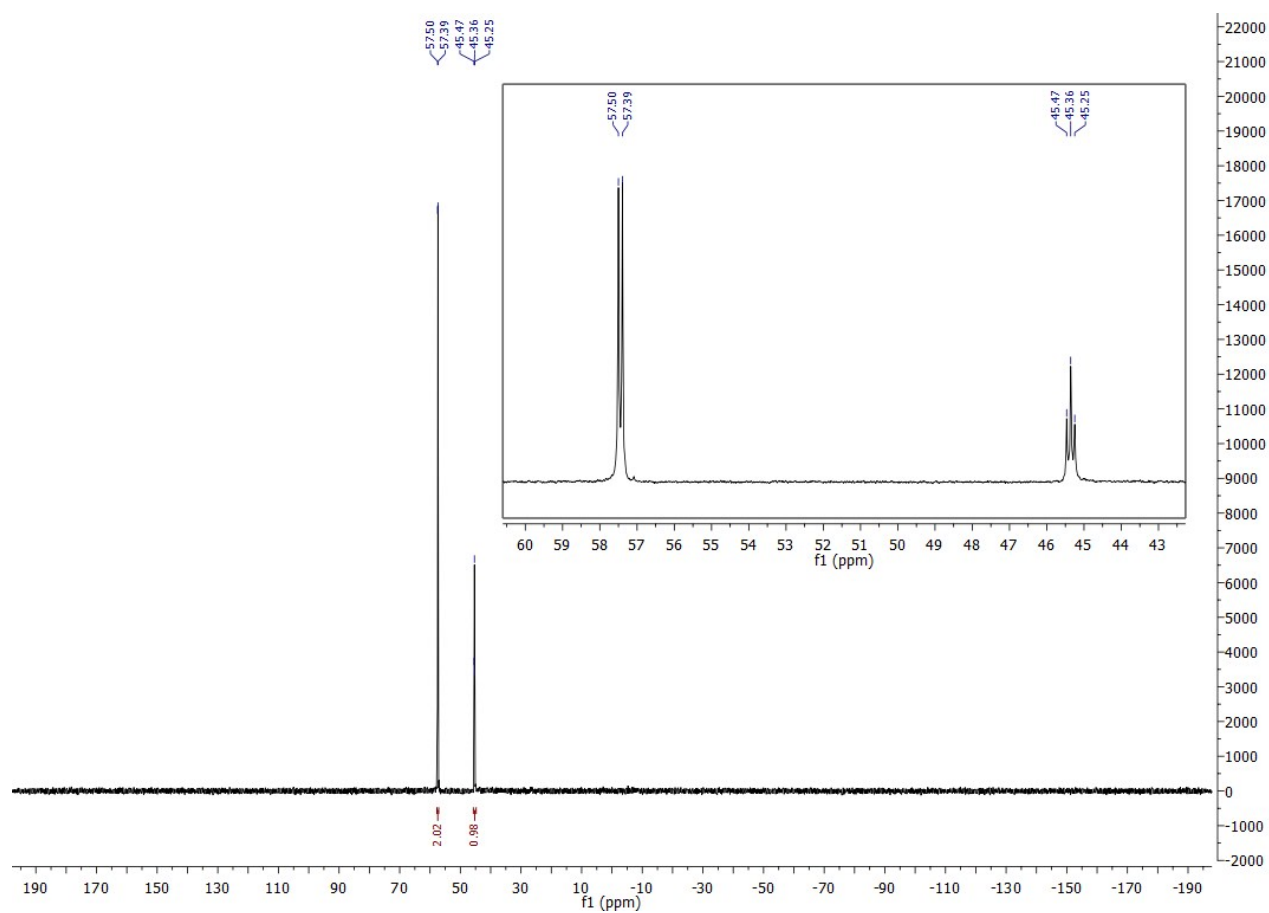

**Figure S2**  $^{31}\text{P}\{^1\text{H}\}$  NMR (400 MHz; toluene- $d_8$ ) of  $[\text{RuH}_2(\text{CO})(\text{PPh}_3)_3]$

## 1.2 Mixture $[\text{RuHD}(\text{CO})(\text{PPh}_3)_3]$ (major species) and $[\text{RuH}_2(\text{CO})(\text{PPh}_3)_3]$ (minor species)

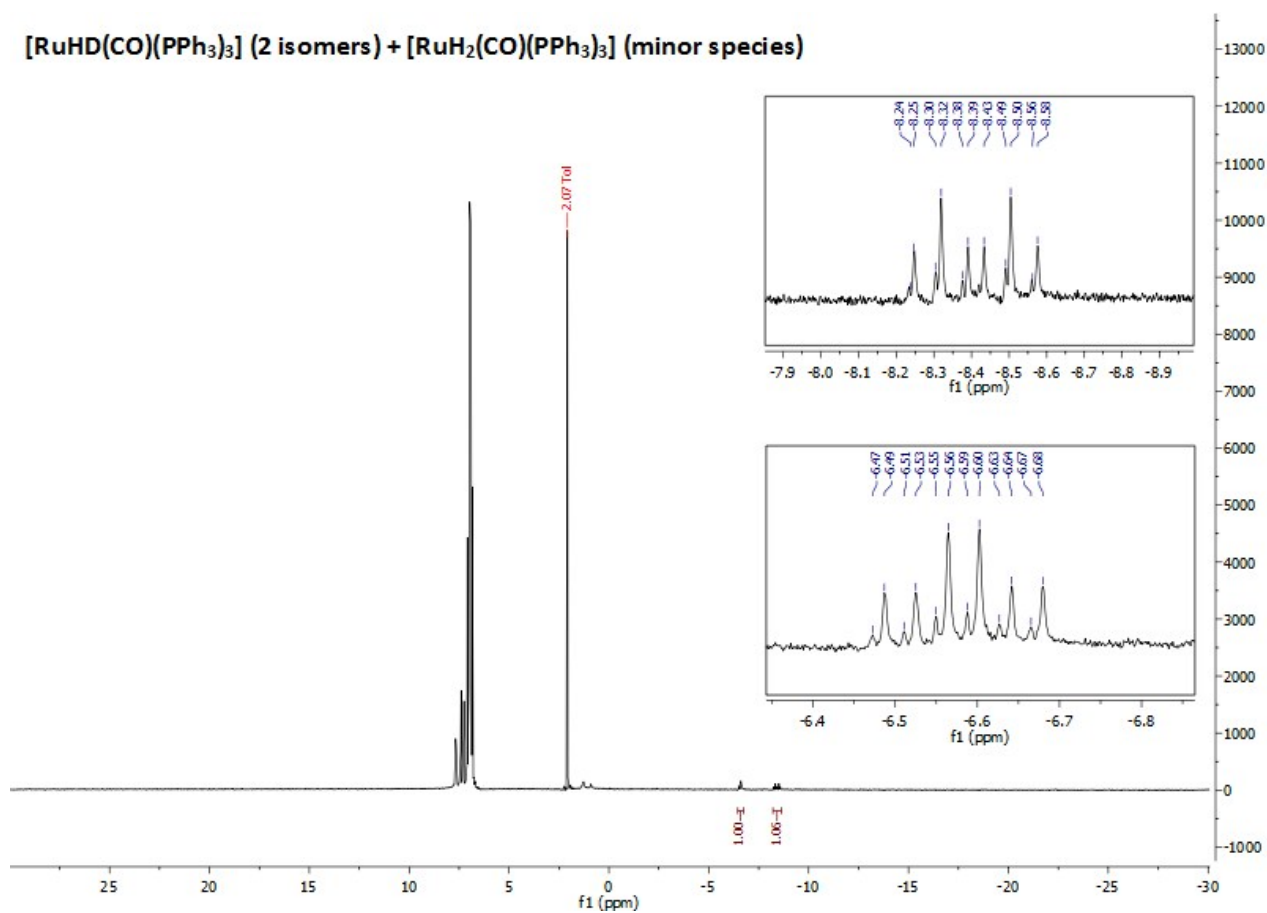

**Figure S3**  $^1\text{H}$  NMR (400 MHz;  $\text{toluene-}d_8$ ) of  $[\text{RuHD}(\text{CO})(\text{PPh}_3)_3]$  (2 isomers) and  $[\text{RuH}_2(\text{CO})(\text{PPh}_3)_3]$  (minor species).

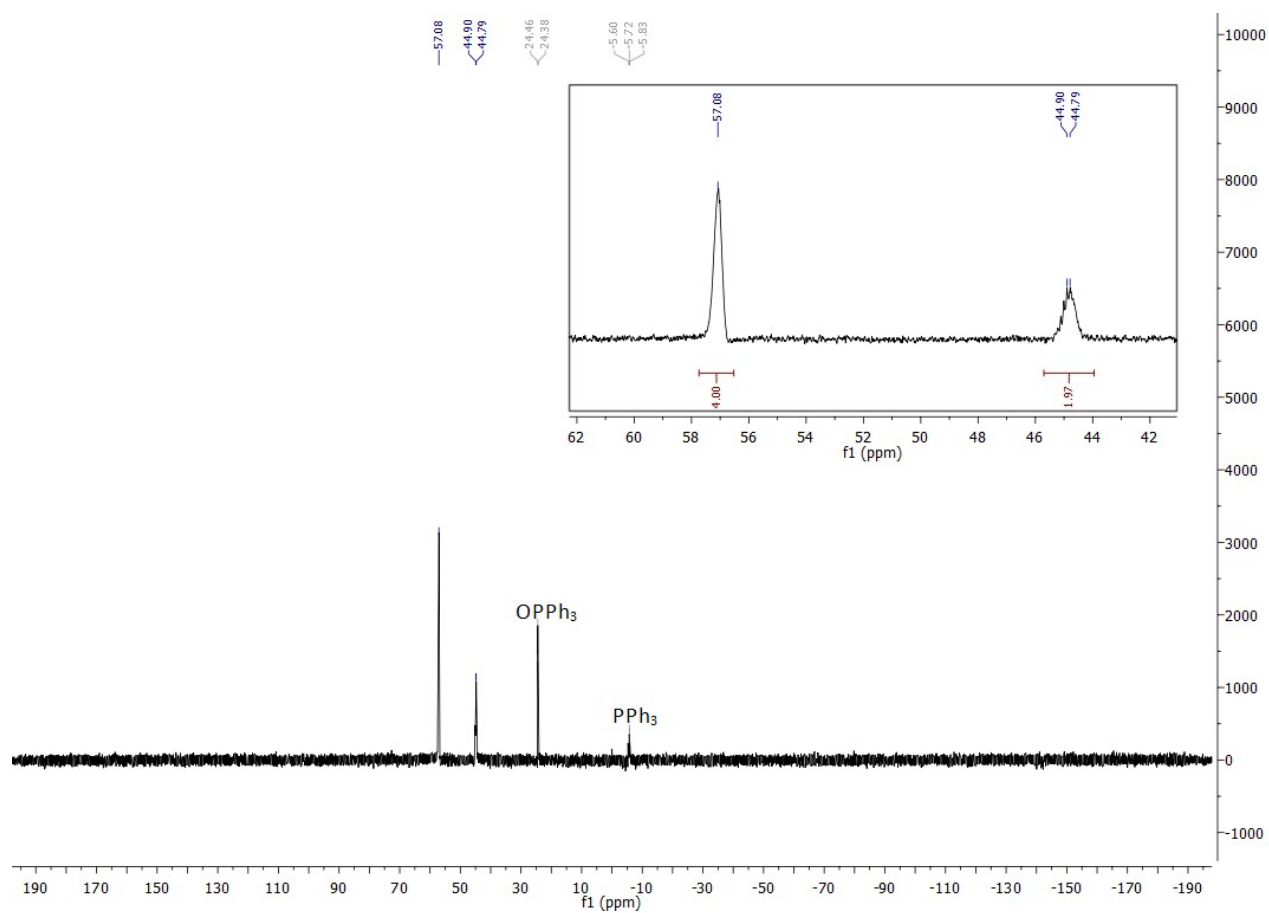

**Figure S4**  $^{31}\text{P}\{^1\text{H}\}$  NMR (400 MHz; toluene- $d_8$ ) of  $[\text{RuHD}(\text{CO})(\text{PPh}_3)_3]$  (2 isomers) and  $[\text{RuH}_2(\text{CO})(\text{PPh}_3)_3]$  (minor species).

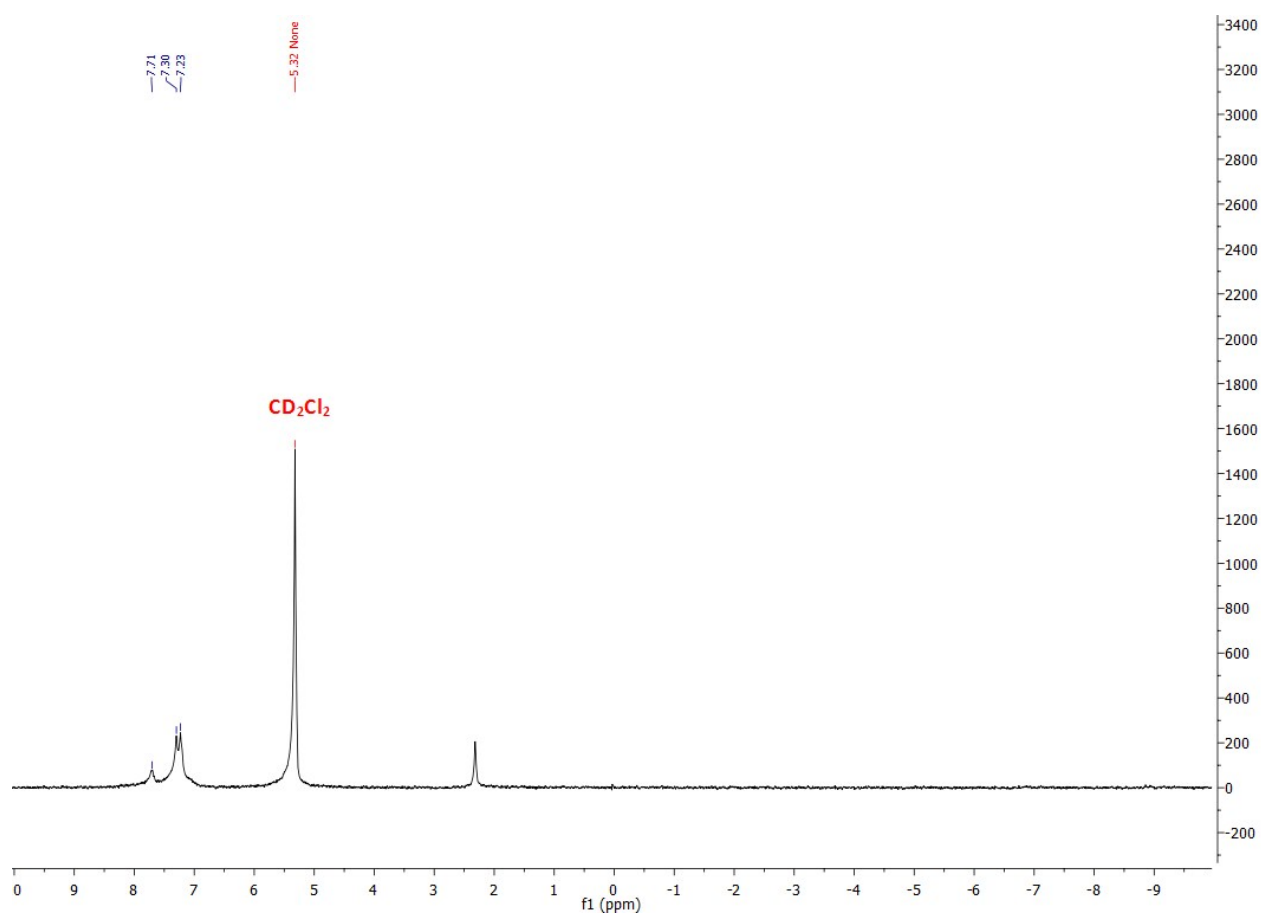

**Figure S5**  $^2\text{H}\{^1\text{H}\}$  NMR (500 MHz;  $\text{CH}_2\text{Cl}_2$ ) of  $[\text{RuHD}(\text{CO})(\text{PPh}_3)_3]$  (2 isomers) and  $[\text{RuH}_2(\text{CO})(\text{PPh}_3)_3]$  (minor species).

### 1.3 Potential $[\text{RuD}_2(\text{CO})(\text{PPh}_3)_3]$

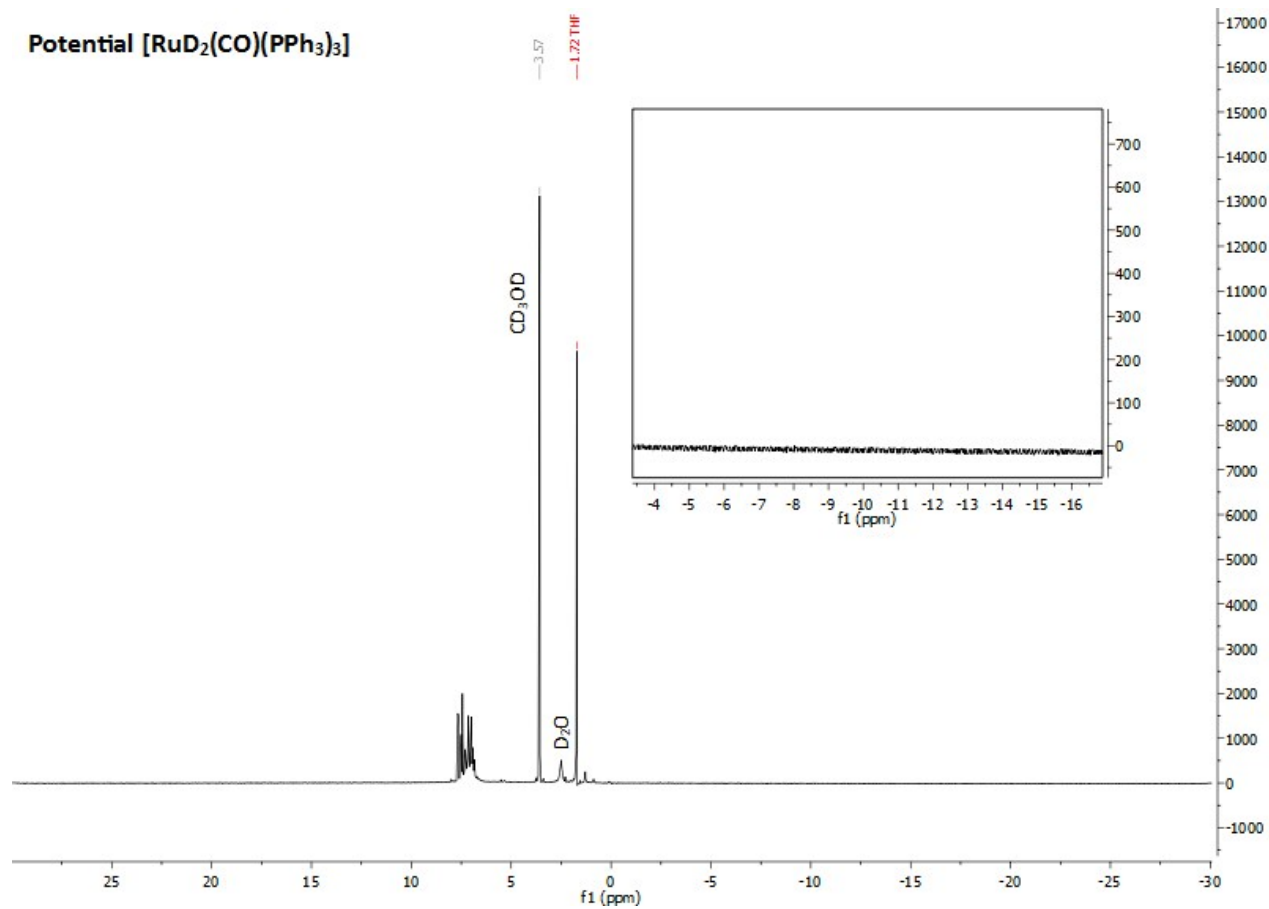

**Figure S6**  $^1\text{H}$  NMR (400 MHz;  $\text{THF-}d_8$ ) of  $[\text{RuD}_2(\text{CO})(\text{PPh}_3)_3]$

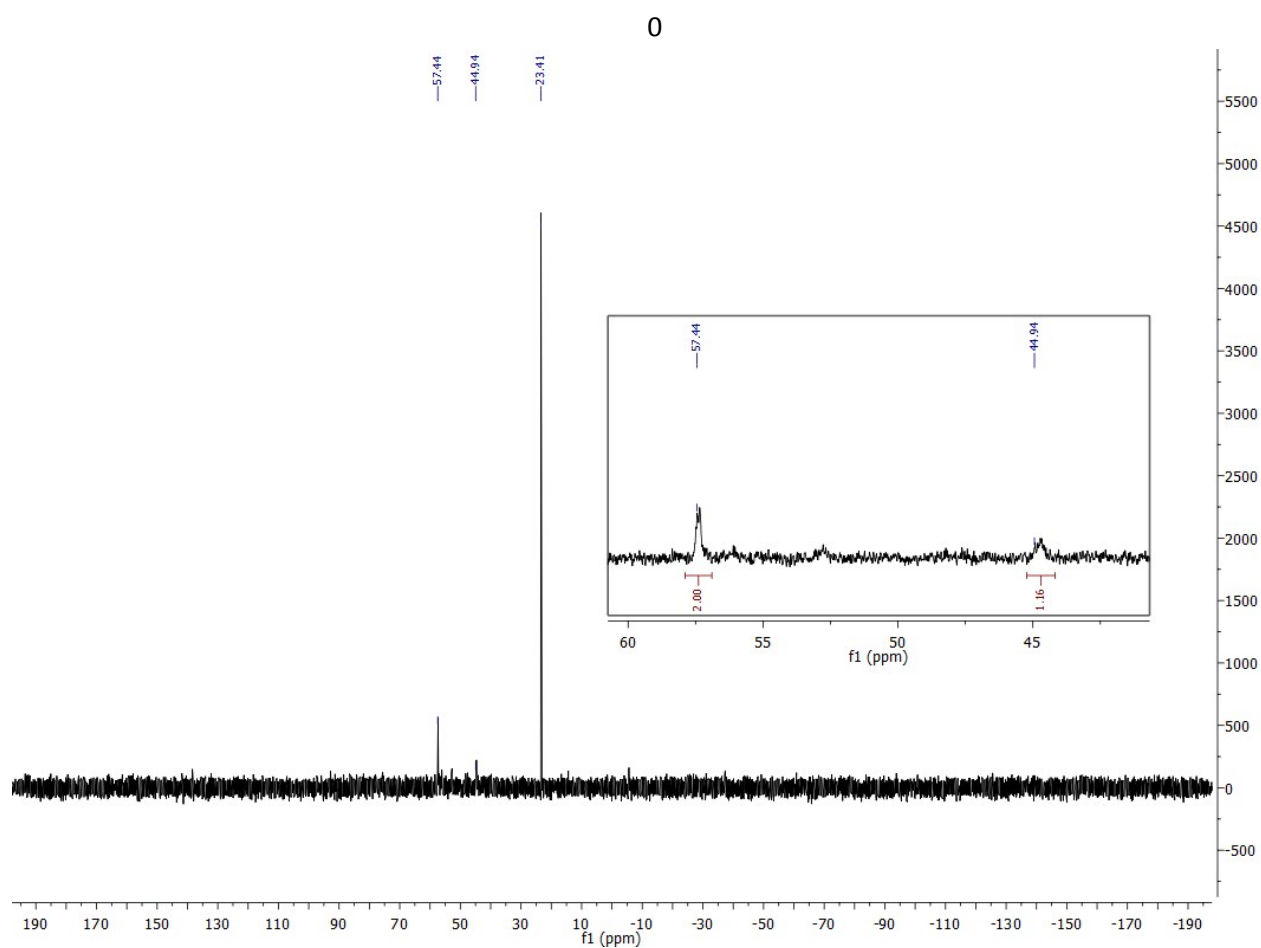

**Figure S7**  $^{31}\text{P}\{^1\text{H}\}$  NMR (400 MHz;  $\text{THF-}d_8$ ) of  $[\text{RuD}_2(\text{CO})(\text{PPh}_3)_3]$

#### 1.4 $[\text{RuH}_2(^{13}\text{CO})(\text{PPh}_3)_3]$ (experiment used for determining the KIE)

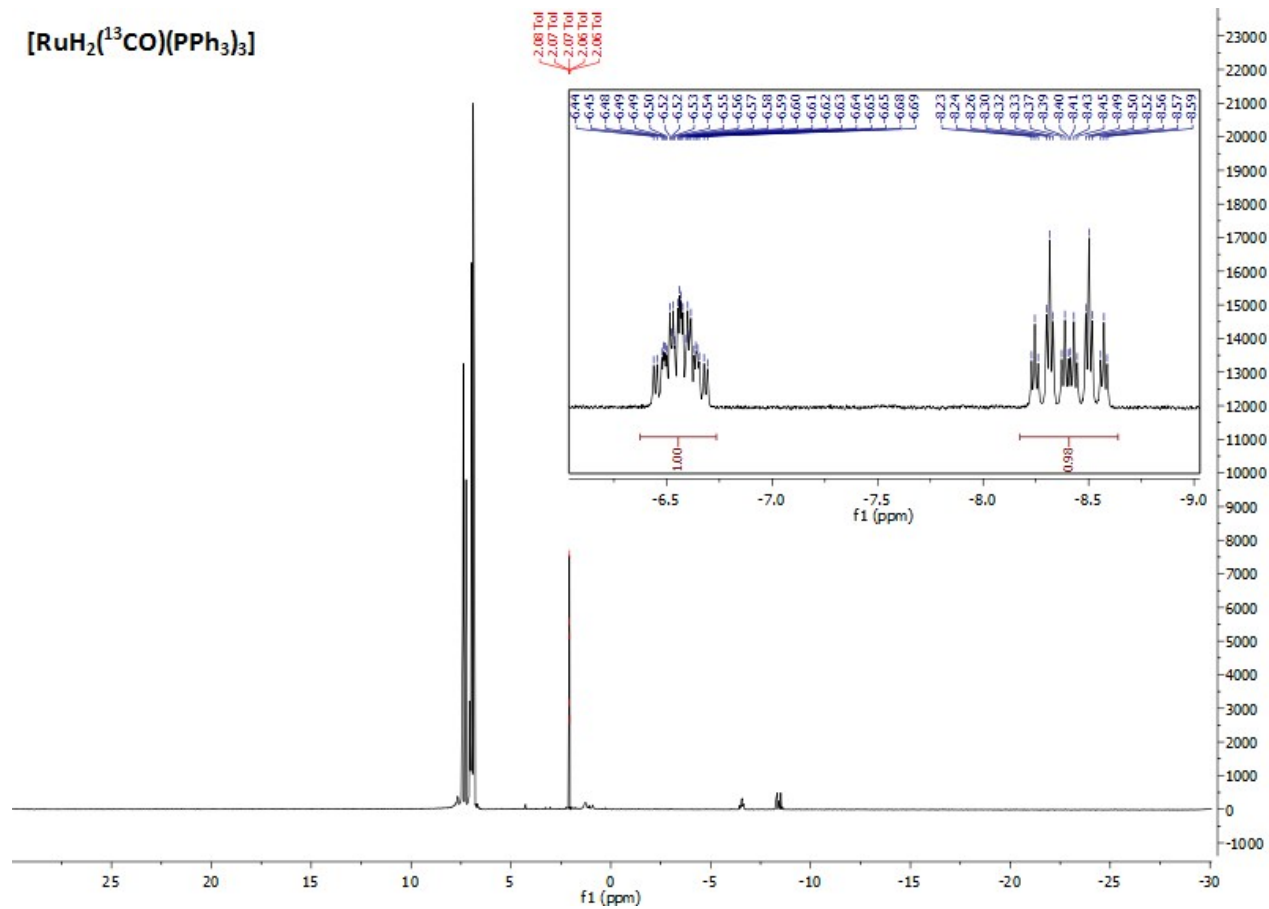

**Figure S8**  $^1\text{H}$  NMR (400 MHz; toluene- $d_8$ ) of  $[\text{RuH}_2(^{13}\text{CO})(\text{PPh}_3)_3]$



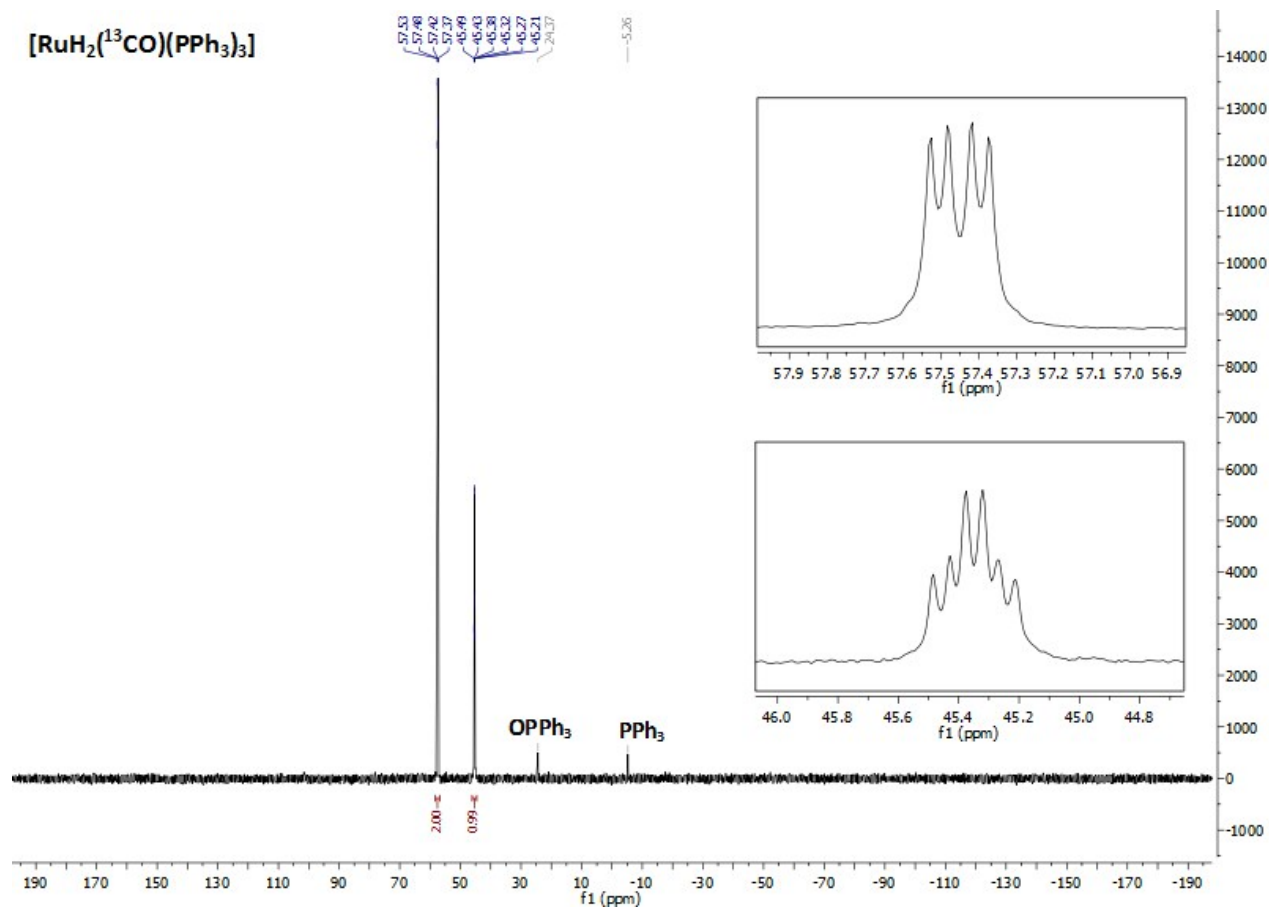

**Figure S9**  $^{31}\text{P}\{^1\text{H}\}$  NMR (400 MHz; toluene- $d_8$ ) of  $[\text{RuH}_2(^{13}\text{CO})(\text{PPh}_3)_3]$

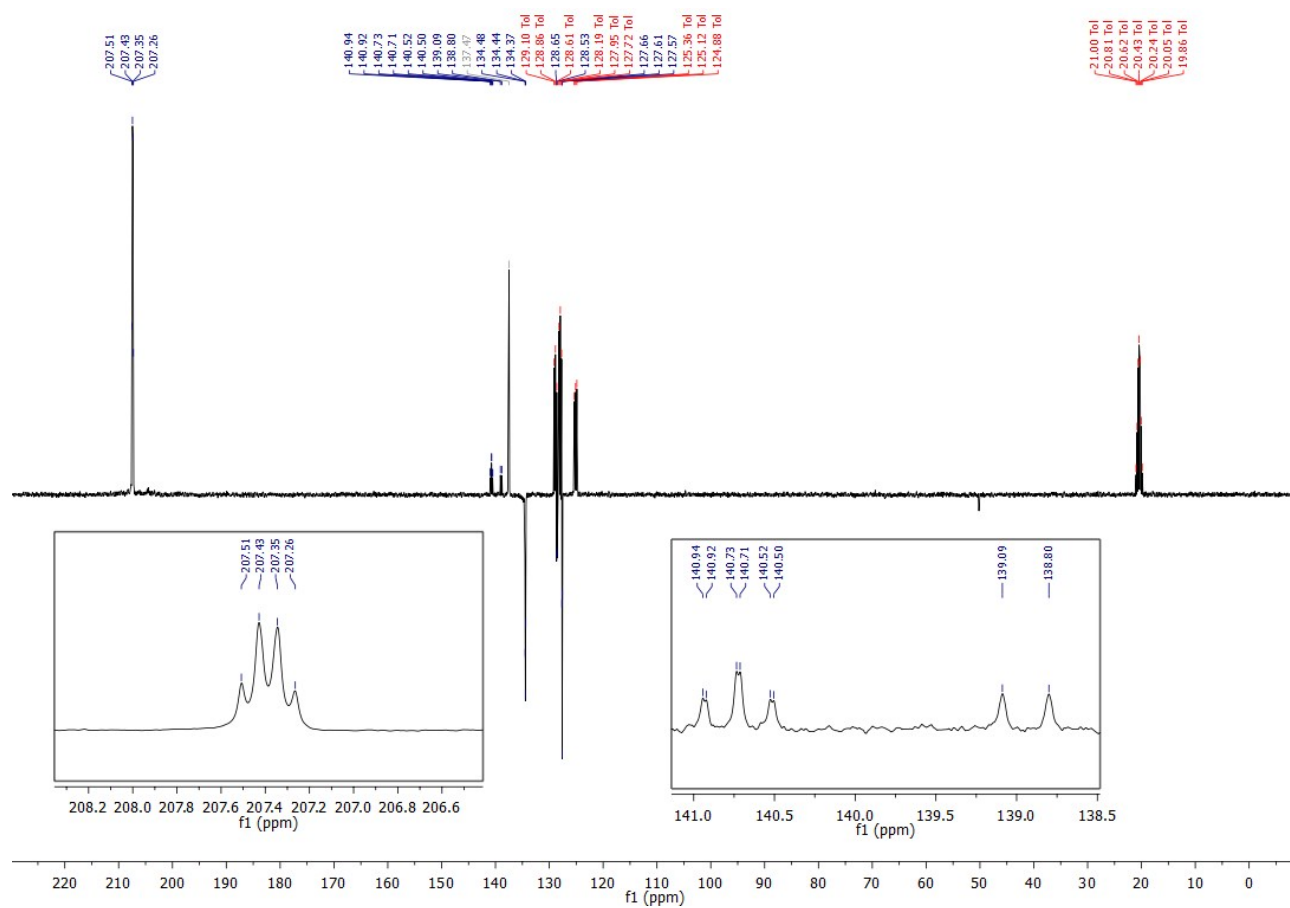

**Figure S10**  $^{13}\text{C}\{^1\text{H}\}$  NMR (400 MHz; toluene- $d_8$ ) of  $[\text{RuH}_2(^{13}\text{CO})(\text{PPh}_3)_3]$

**1.5 Mixture of  $[\text{RuH}_2(^{13}\text{CO})(\text{PPh}_3)_3]$  and  $[\text{RuHD}(\text{CO})(\text{PPh}_3)_3]$  (experiment used for determining the KIE)**

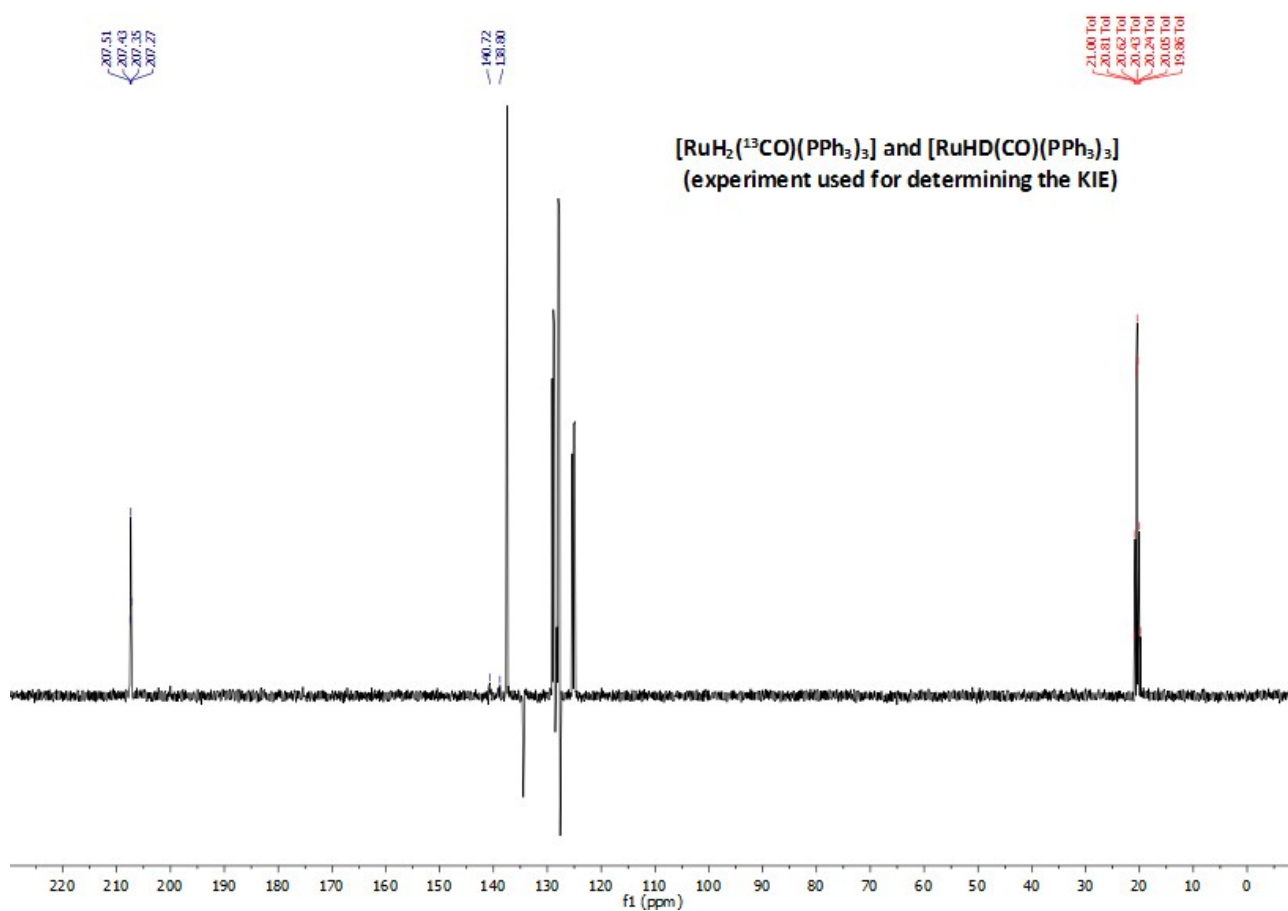

**Figure S11**  $^{13}\text{C}\{^1\text{H}\}$  NMR (400 MHz; toluene- $d_8$ ) of  $[\text{RuH}_2(^{13}\text{CO})(\text{PPh}_3)_3]$  and  $[\text{RuHD}(\text{CO})(\text{PPh}_3)_3]$

**1.6 Mixture of  $[\text{RuH}_2(\text{CO})(\text{PPh}_3)_3]$  and  $[\text{RuHD}(\text{CO})(\text{PPh}_3)_3]$**

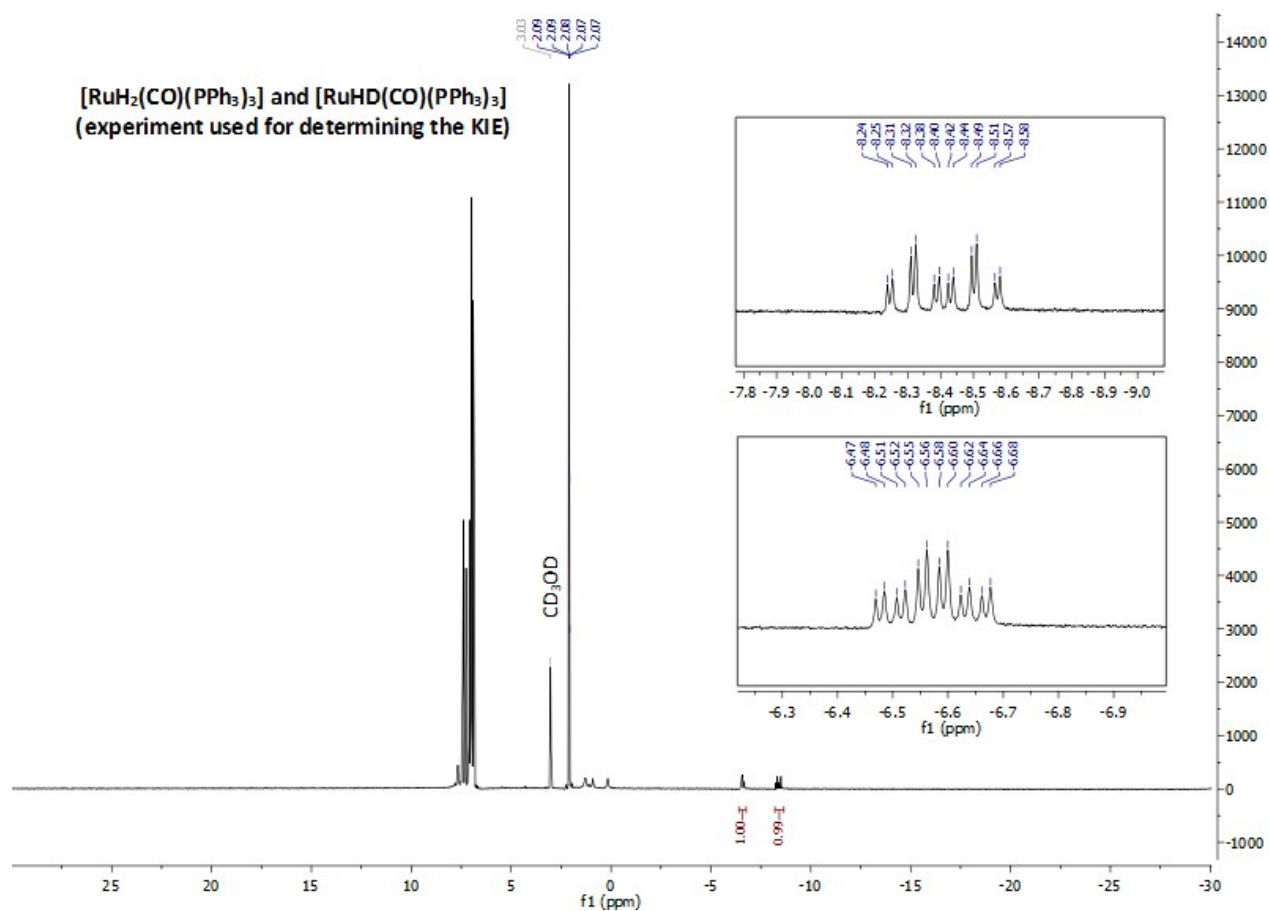

**Figure S12** <sup>1</sup>H NMR (400 MHz; toluene-*d*<sub>8</sub>) of [RuH<sub>2</sub>(CO)(PPh<sub>3</sub>)<sub>3</sub>] and [RuHD(CO)(PPh<sub>3</sub>)<sub>3</sub>]

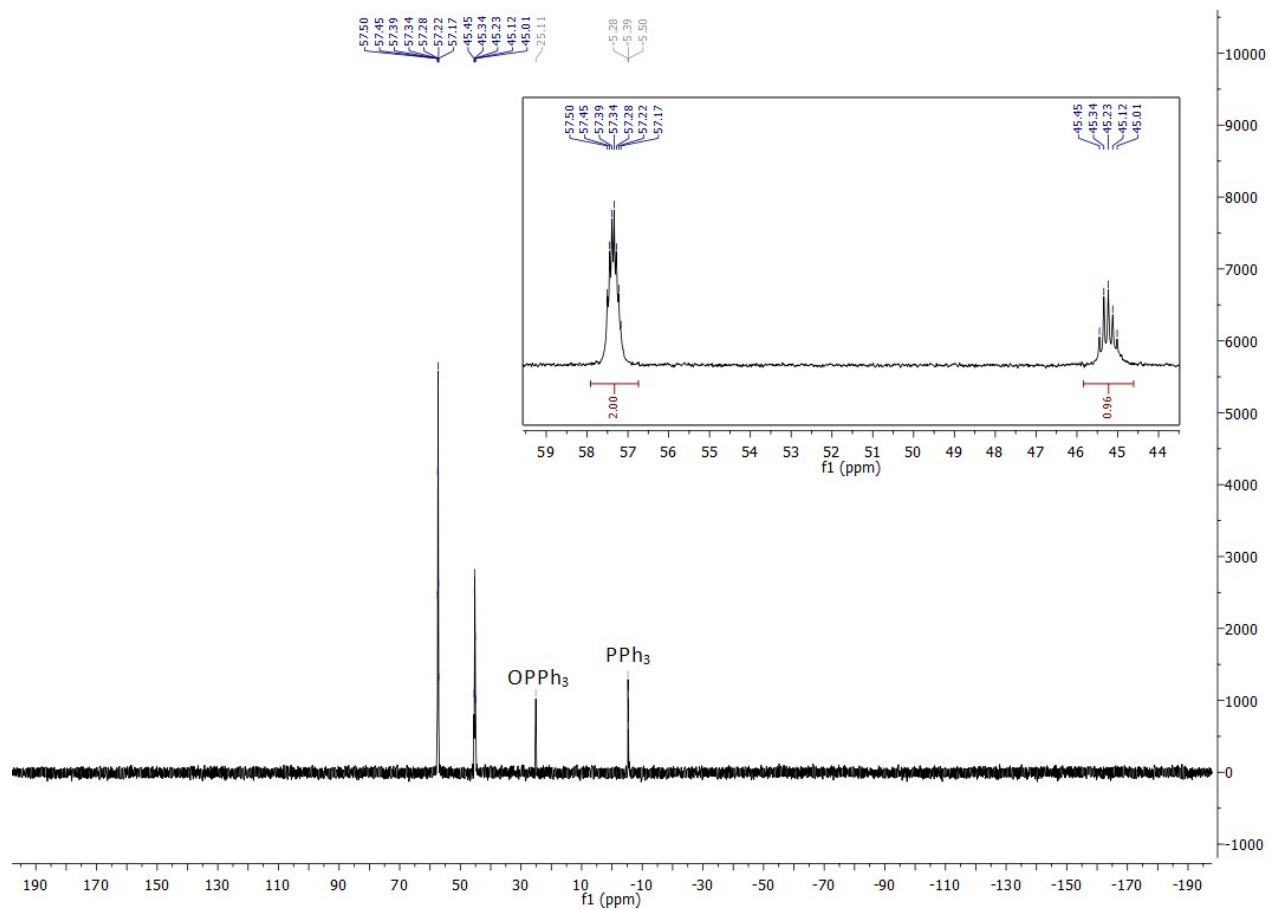

**Figure S13**  $^{31}\text{P}\{^1\text{H}\}$  NMR (400 MHz; toluene- $d_8$ ) of  $[\text{RuH}_2(\text{CO})(\text{PPh}_3)_3]$  and  $[\text{RuHD}(\text{CO})(\text{PPh}_3)_3]$

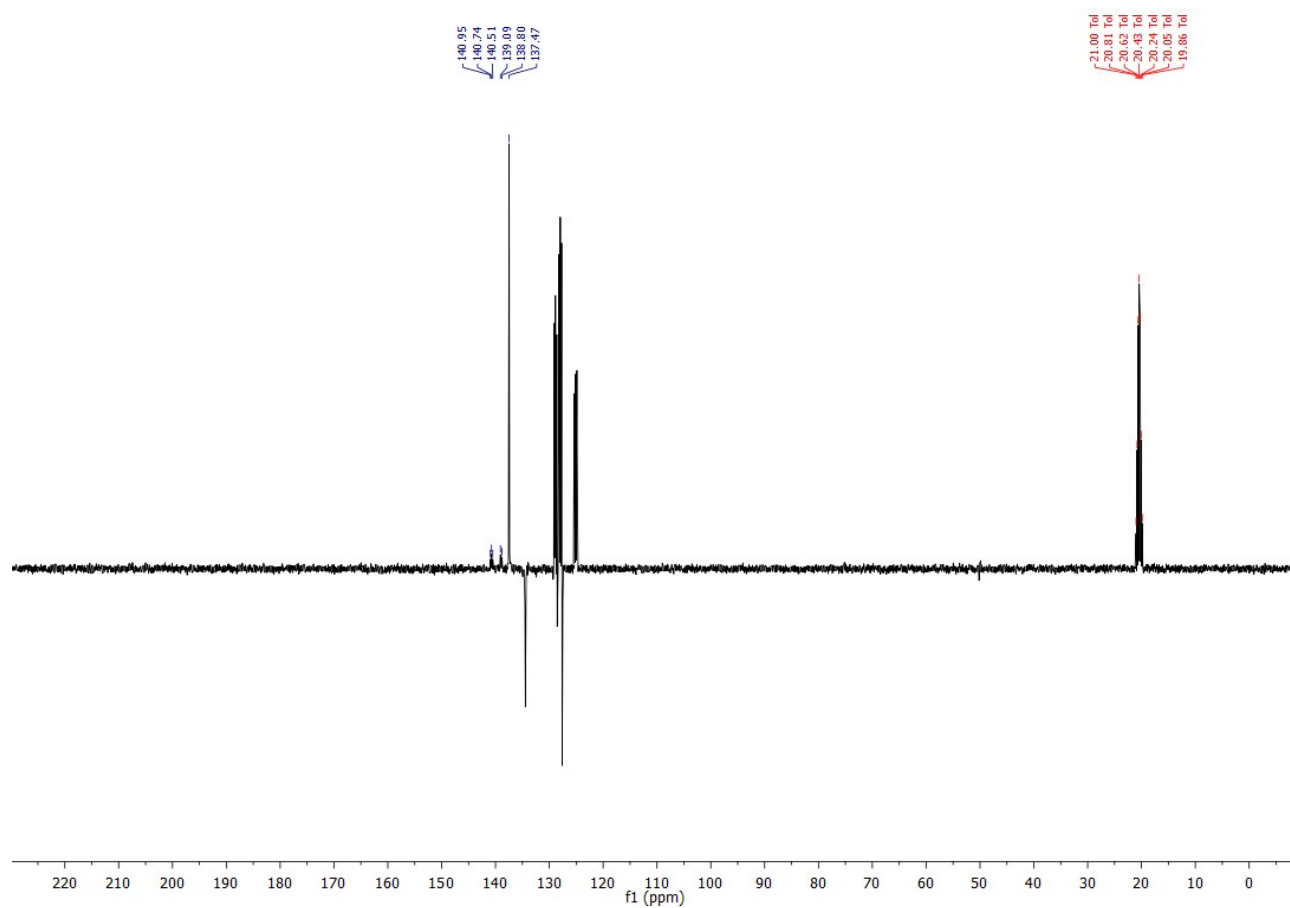

**Figure S14**  $^{13}\text{C}\{^1\text{H}\}$  NMR (400 MHz; toluene- $d_8$ ) of  $[\text{RuH}_2(\text{CO})(\text{PPh}_3)_3]$  and  $[\text{RuHD}(\text{CO})(\text{PPh}_3)_3]$

## 1.7 Time and temperature dependent NMR studies with NaOCD<sub>3</sub>

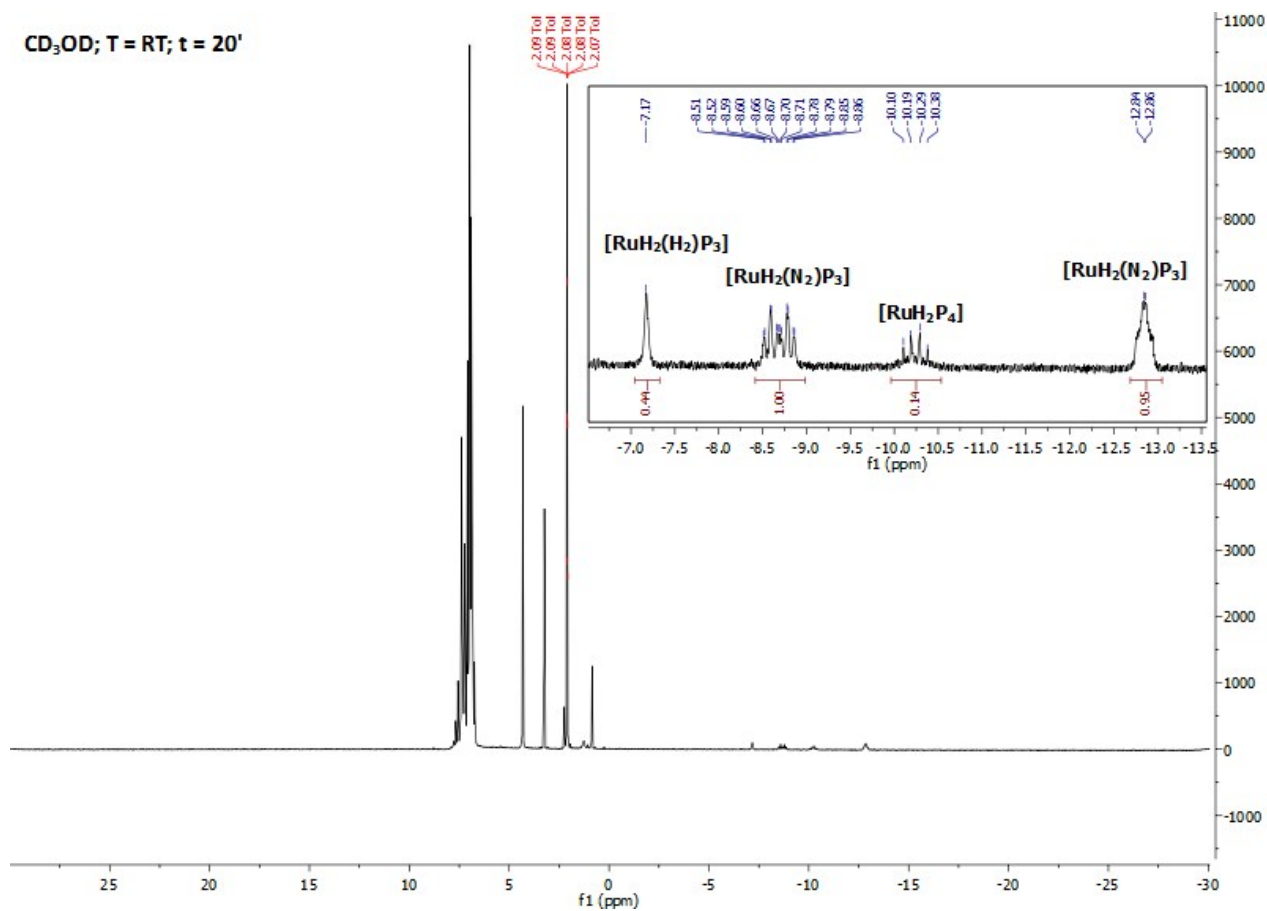

Figure S15 <sup>1</sup>H NMR (400 MHz; toluene-*d*<sub>8</sub>); First step: 20 min at RT

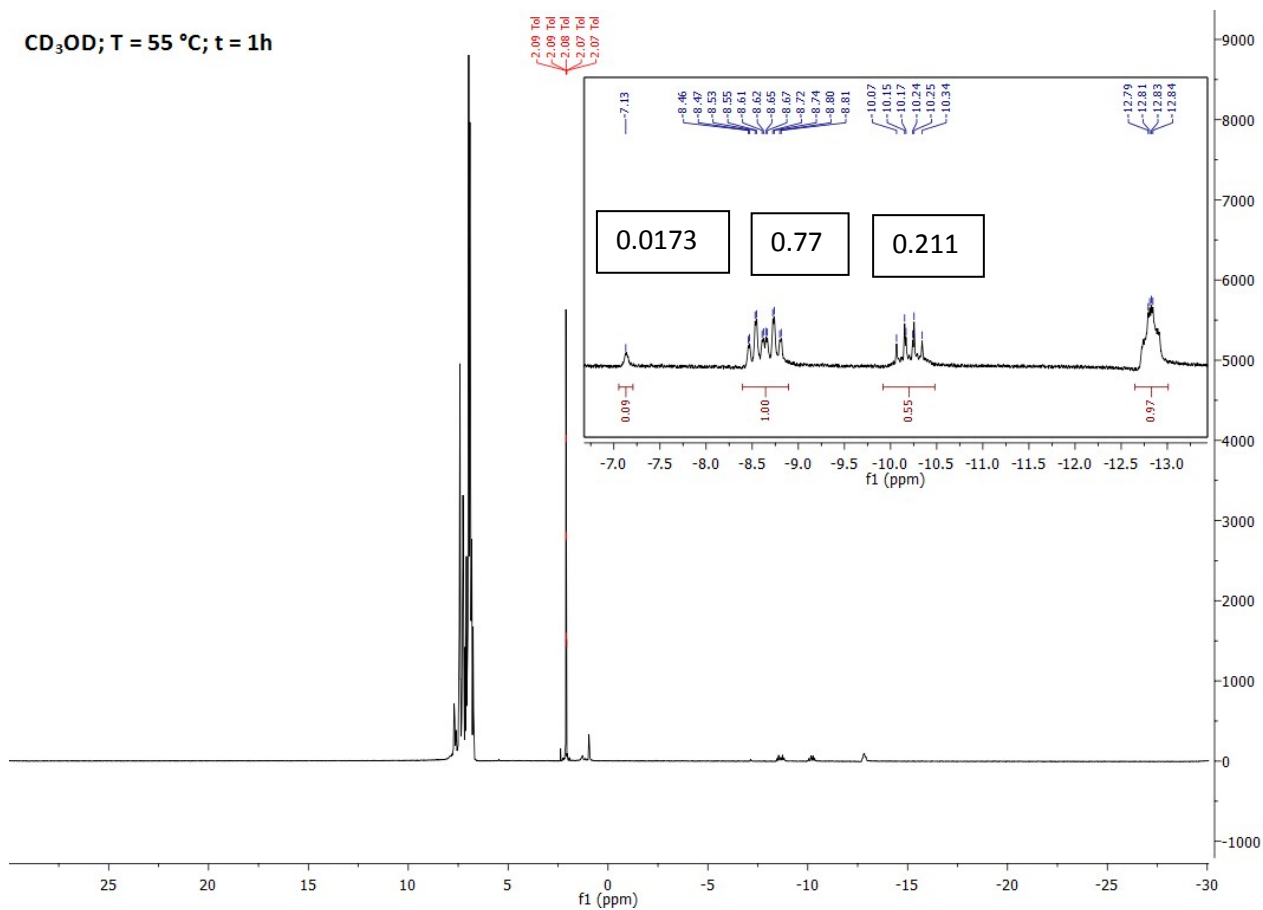

**Figure S16** <sup>1</sup>H NMR (400 MHz; toluene-*d*<sub>8</sub>); Second step: 40 min at 55 °C.



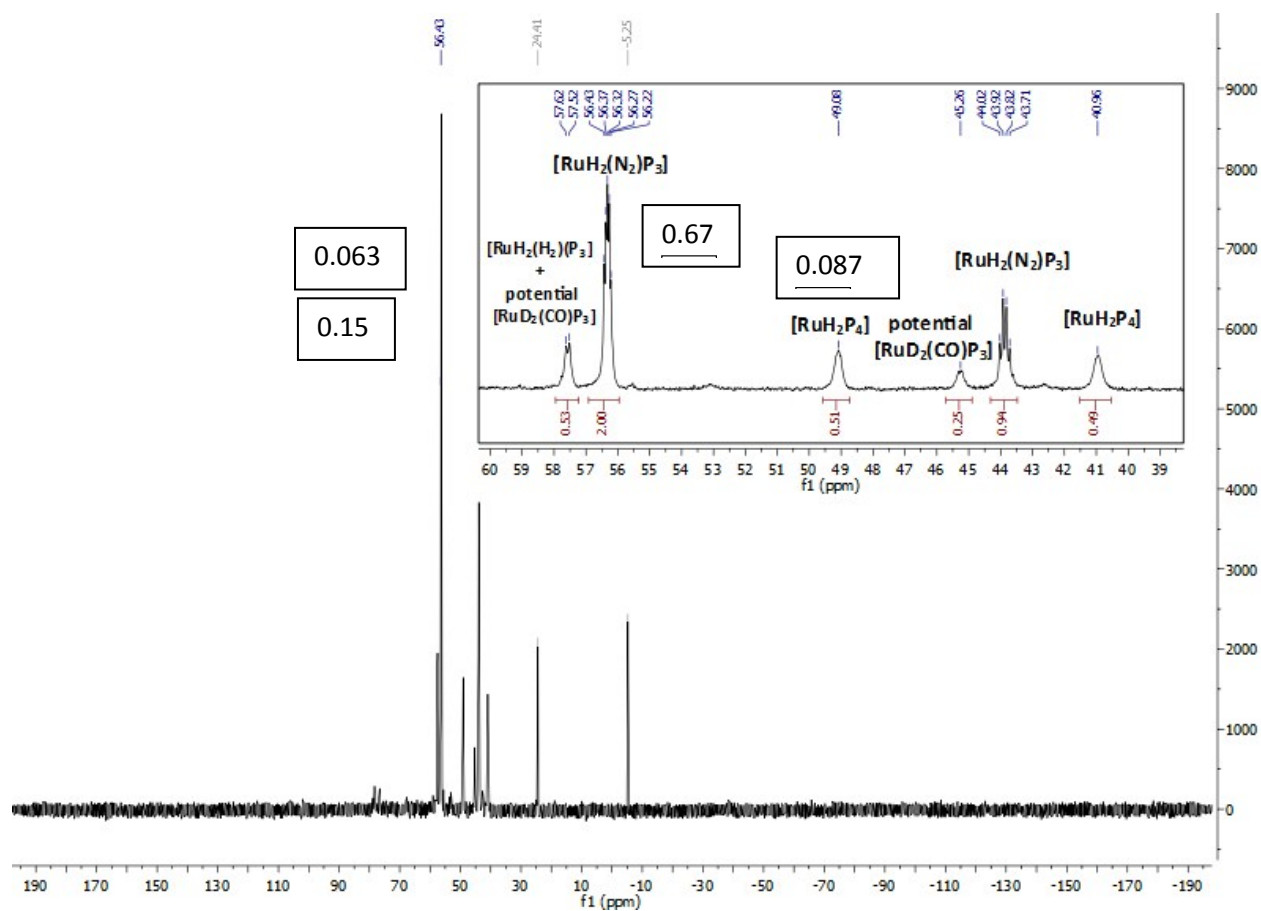

**Figure S17**  $^{31}\text{P}\{^1\text{H}\}$  NMR (400 MHz; toluene- $d_8$ ); Second step: 40 min at 55 °C.

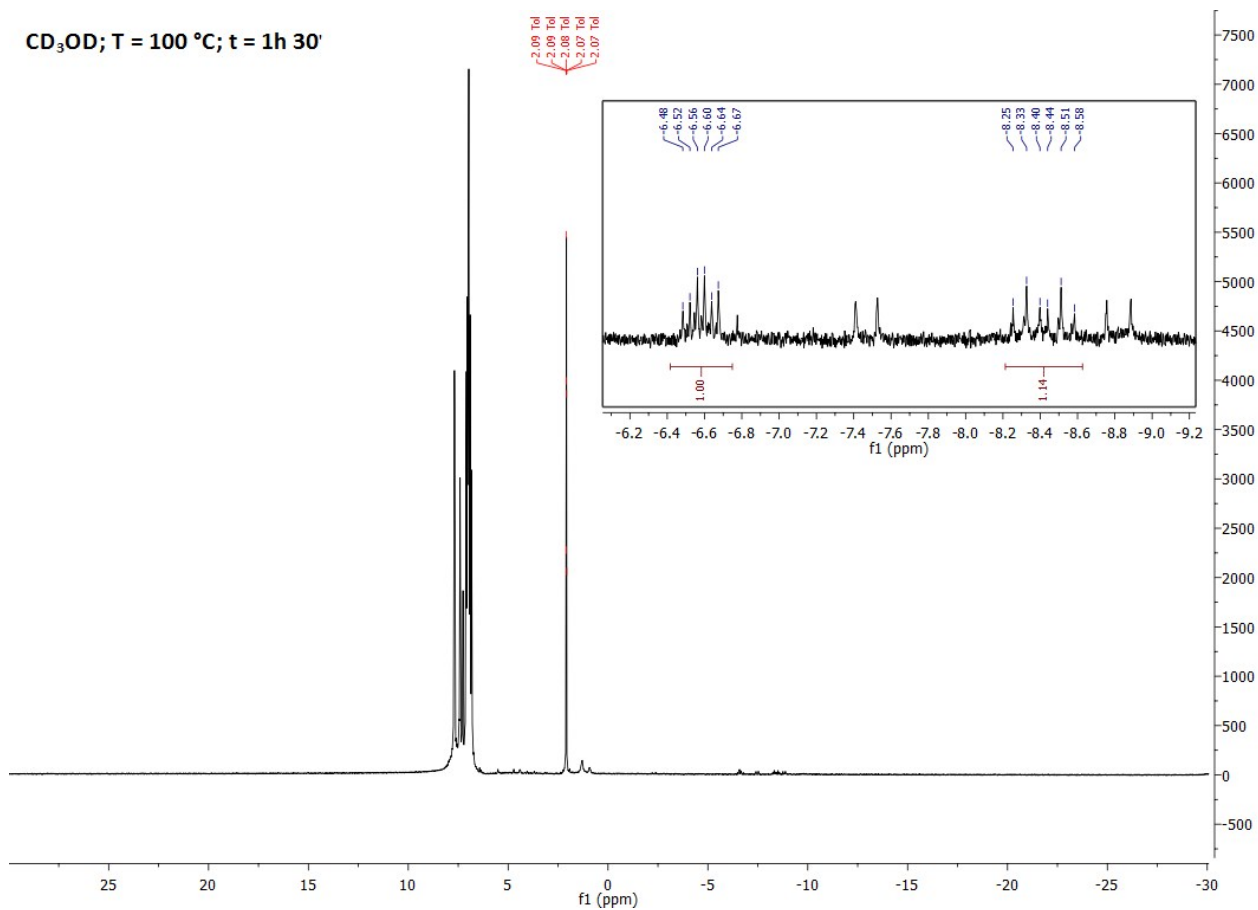

Figure S18 <sup>1</sup>H NMR (400 MHz; toluene-*d*<sub>8</sub>); Third step: 30 min at 100 °C.

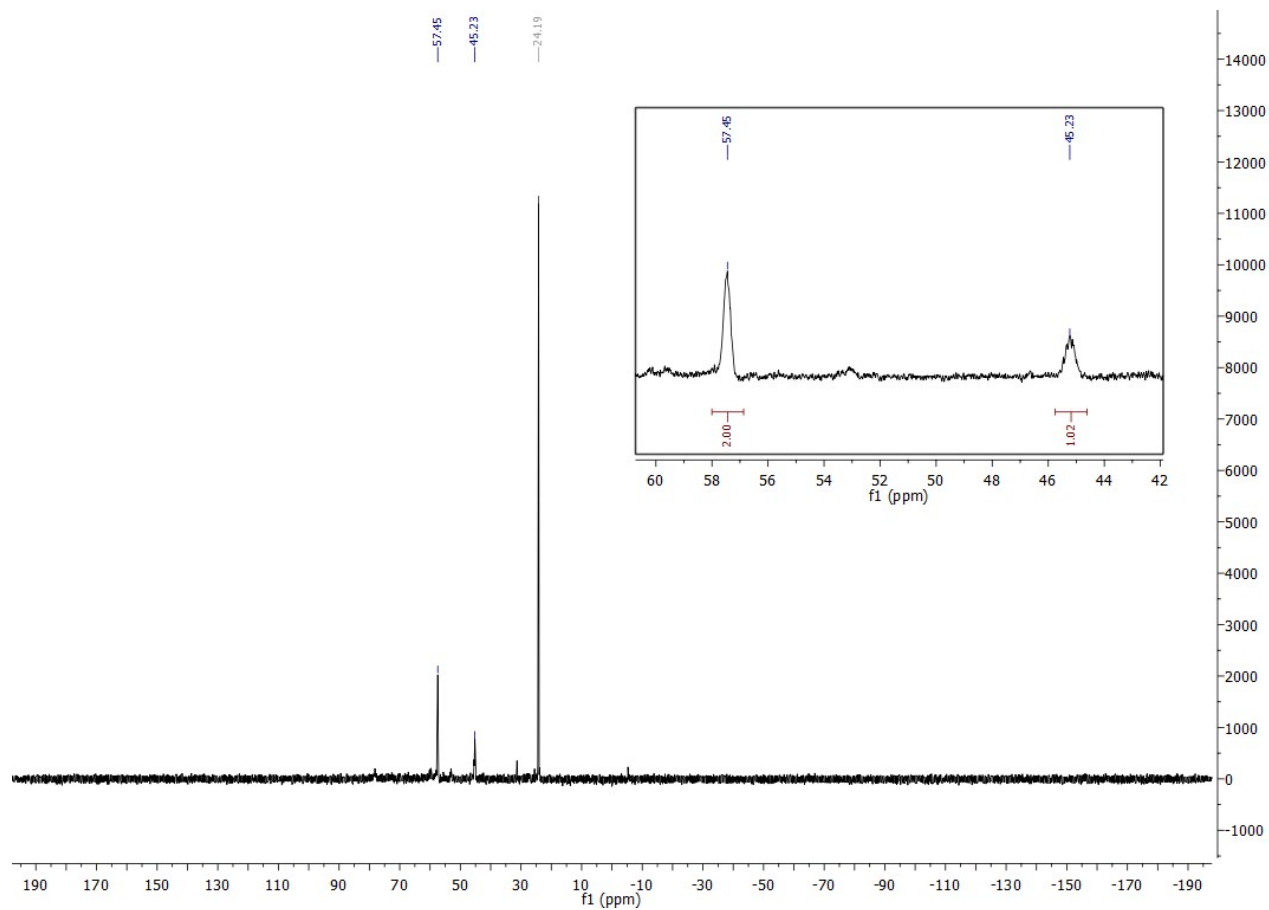

**Figure S19**  $^{31}\text{P}\{^1\text{H}\}$  NMR (400 MHz; toluene- $d_8$ ); Third step: 30 min at 100 °C.

## 1.8 Time and temperature dependent NMR studies with NaOCH<sub>3</sub>

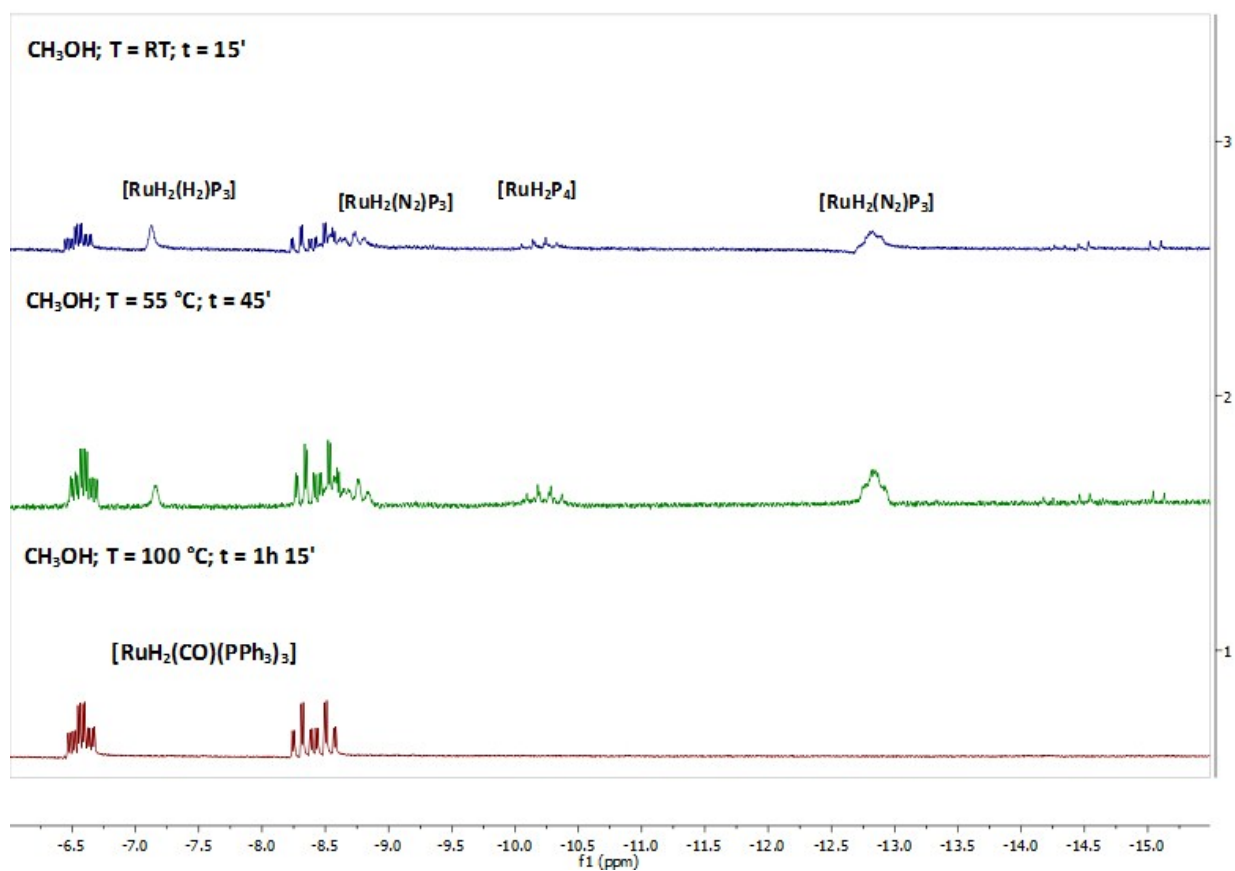

**Figure S20** <sup>1</sup>H NMR (400 MHz; toluene-*d*<sub>8</sub>). Time and temperature dependent <sup>1</sup>H NMR study of [RuHClP<sub>3</sub>] with NaOCH<sub>3</sub>: hydride region of the reaction mixture.

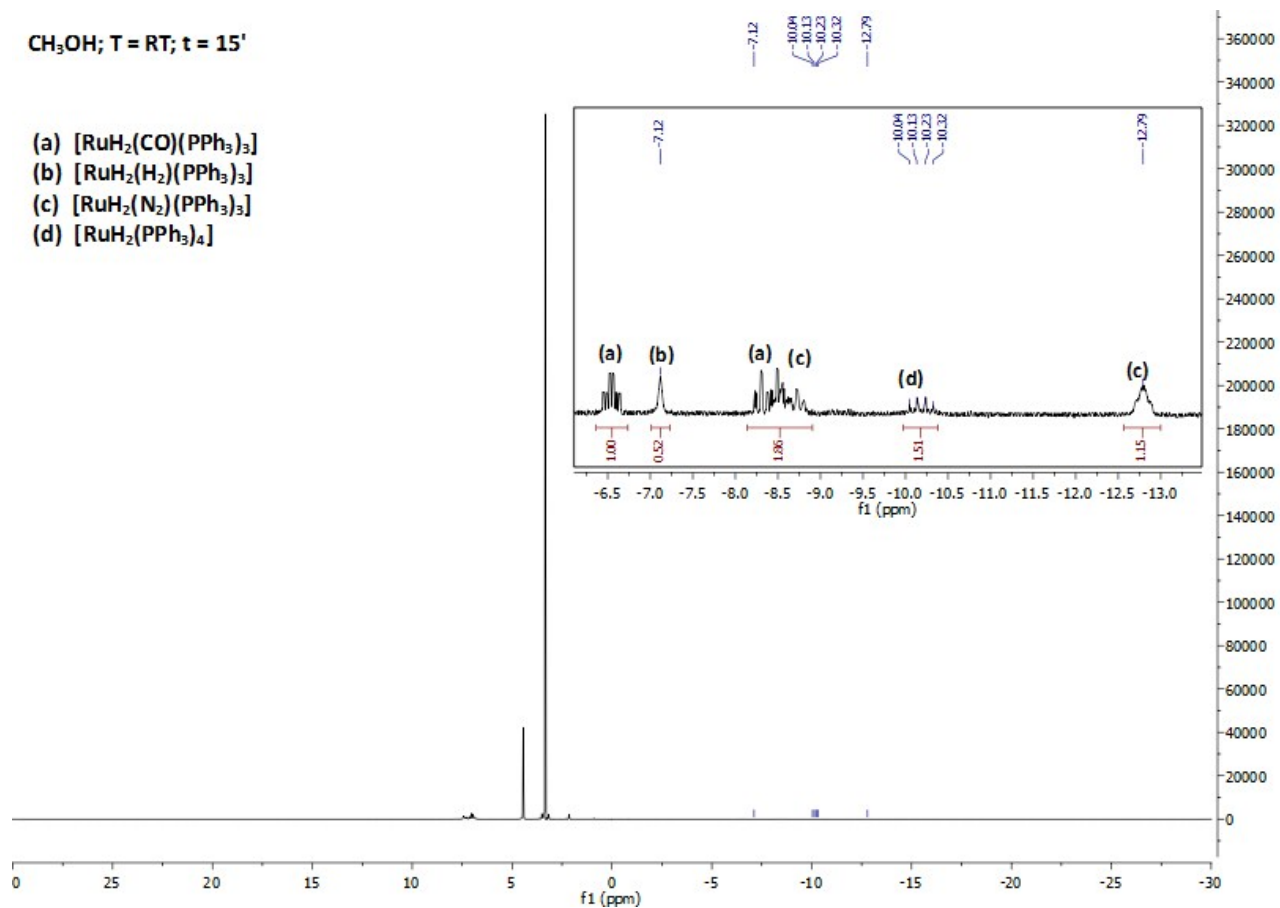

**Figure S21** <sup>1</sup>H NMR (400 MHz; toluene-*d*<sub>8</sub>); First step: 15 min at RT.

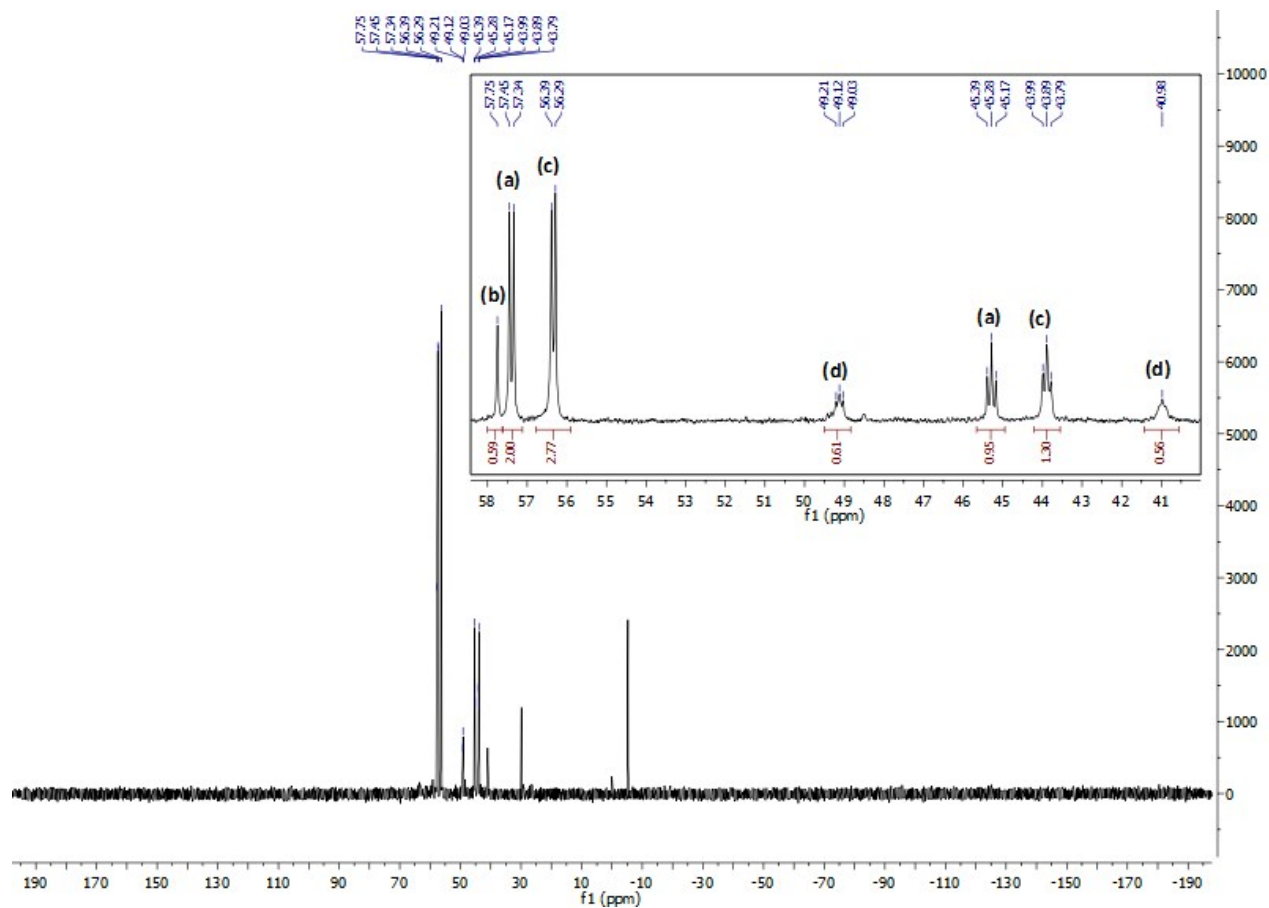

**Figure S22**  $^{31}\text{P}\{^1\text{H}\}$  NMR (400 MHz; toluene- $d_8$ ); First step: 15 min at RT.

CH<sub>3</sub>OH; T = 55 °C; t = 45'

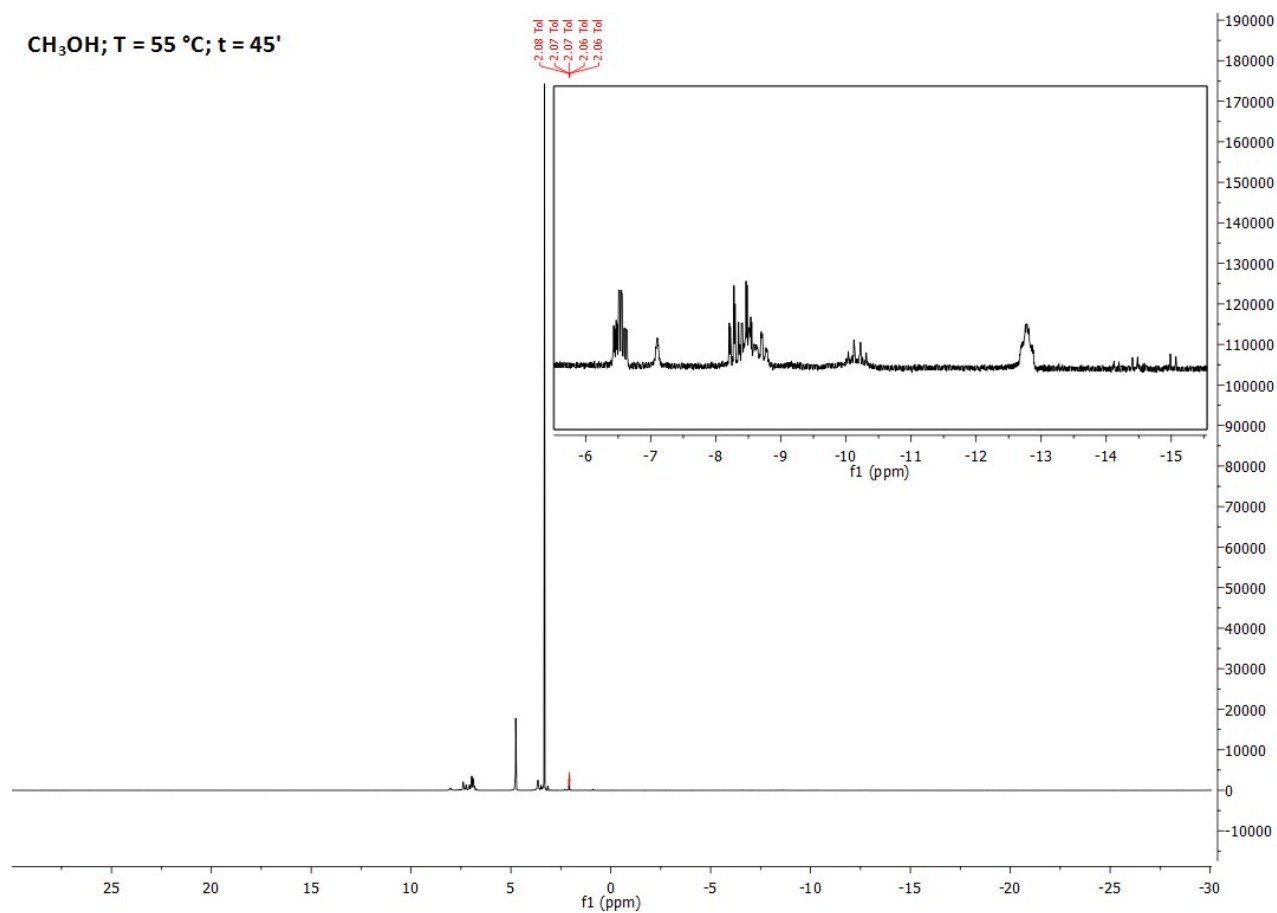

**Figure S23** <sup>1</sup>H NMR (400 MHz; toluene-*d*<sub>8</sub>); Second step: 30 min at 55 °C.

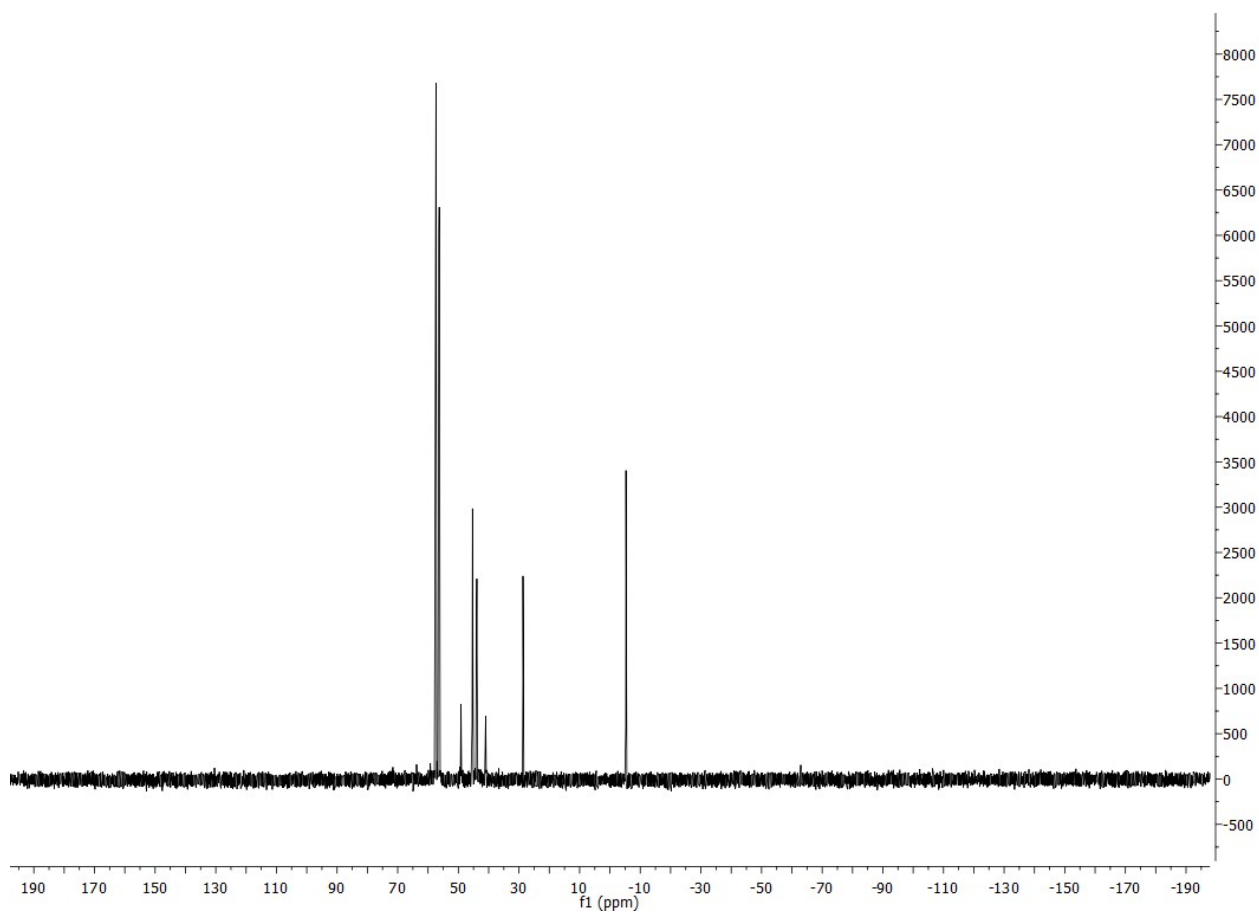

**Figure S24**  $^{31}\text{P}\{^1\text{H}\}$  NMR (400 MHz; toluene- $d_8$ ); Second step: 30 min at 55 °C.



CH<sub>3</sub>OH; T = 100 °C; t = 1 h 15'

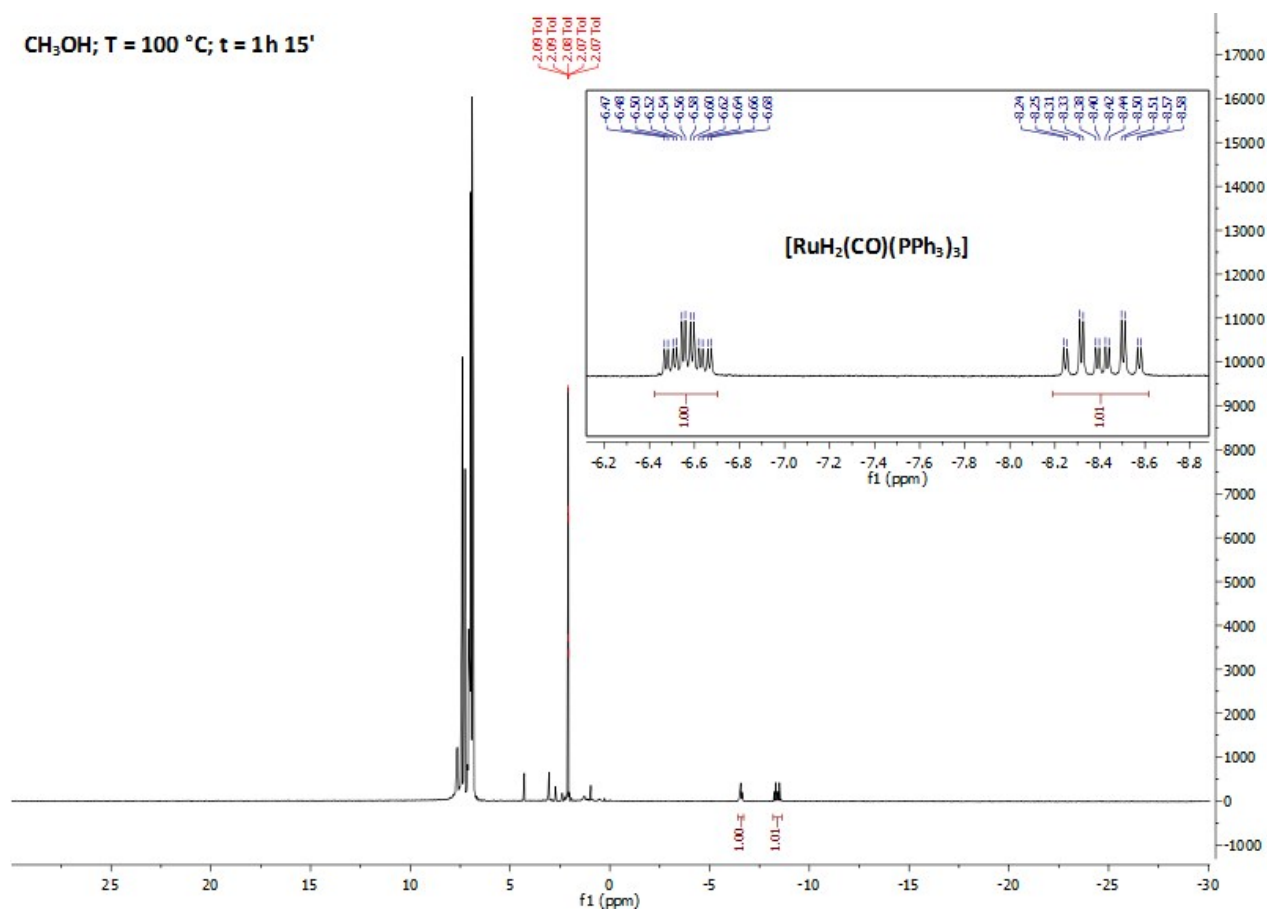

Figure S25 <sup>1</sup>H NMR (400 MHz; toluene-*d*<sub>8</sub>); Third step: 30 min at 100 °C.

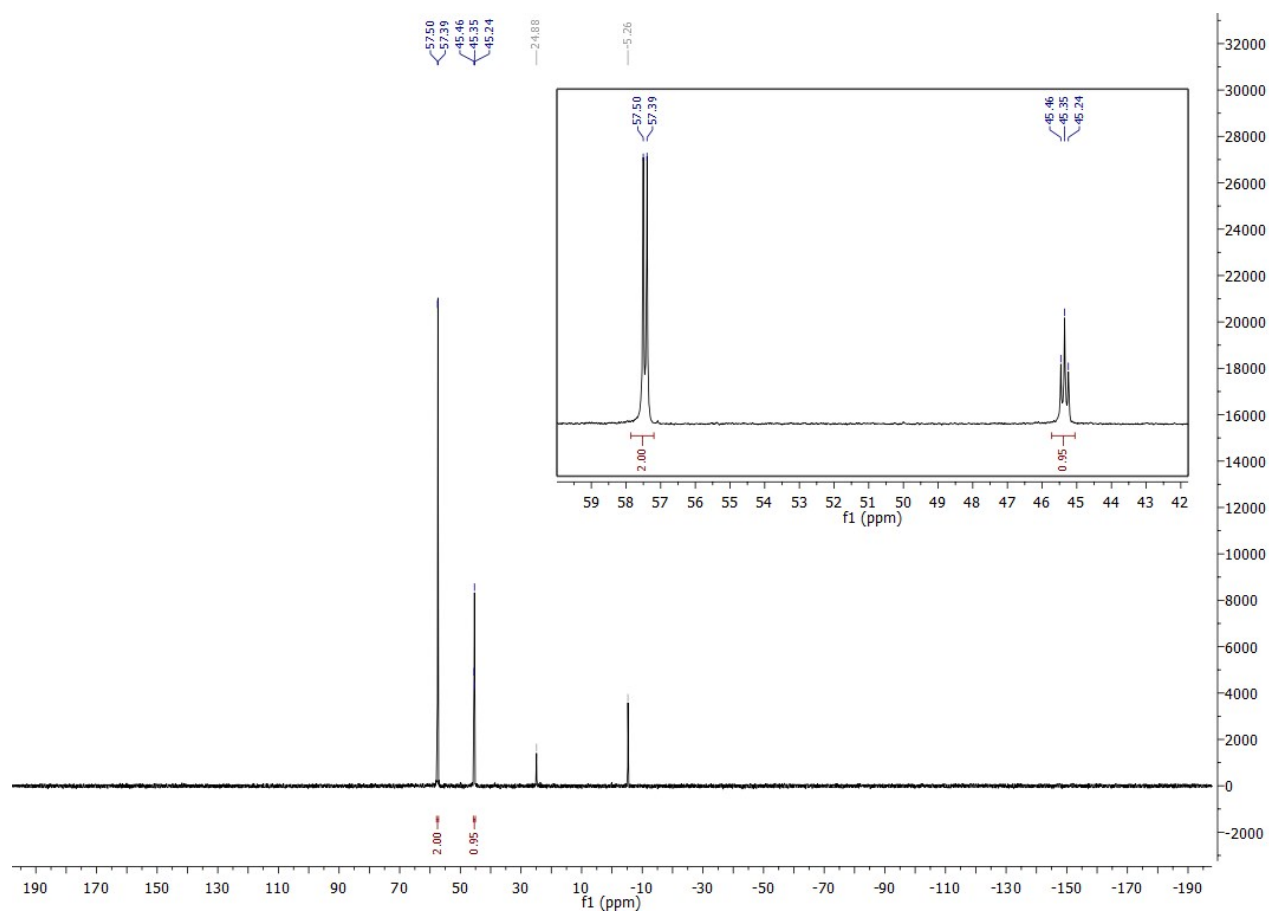

**Figure S26**  $^{31}\text{P}\{^1\text{H}\}$  NMR (400 MHz; toluene- $d_8$ ); Third step: 30 min at 100 °C.

## 1.9 Identification of $[\text{RuH}_2(\text{N}_2)(\text{PPh}_3)_3]$

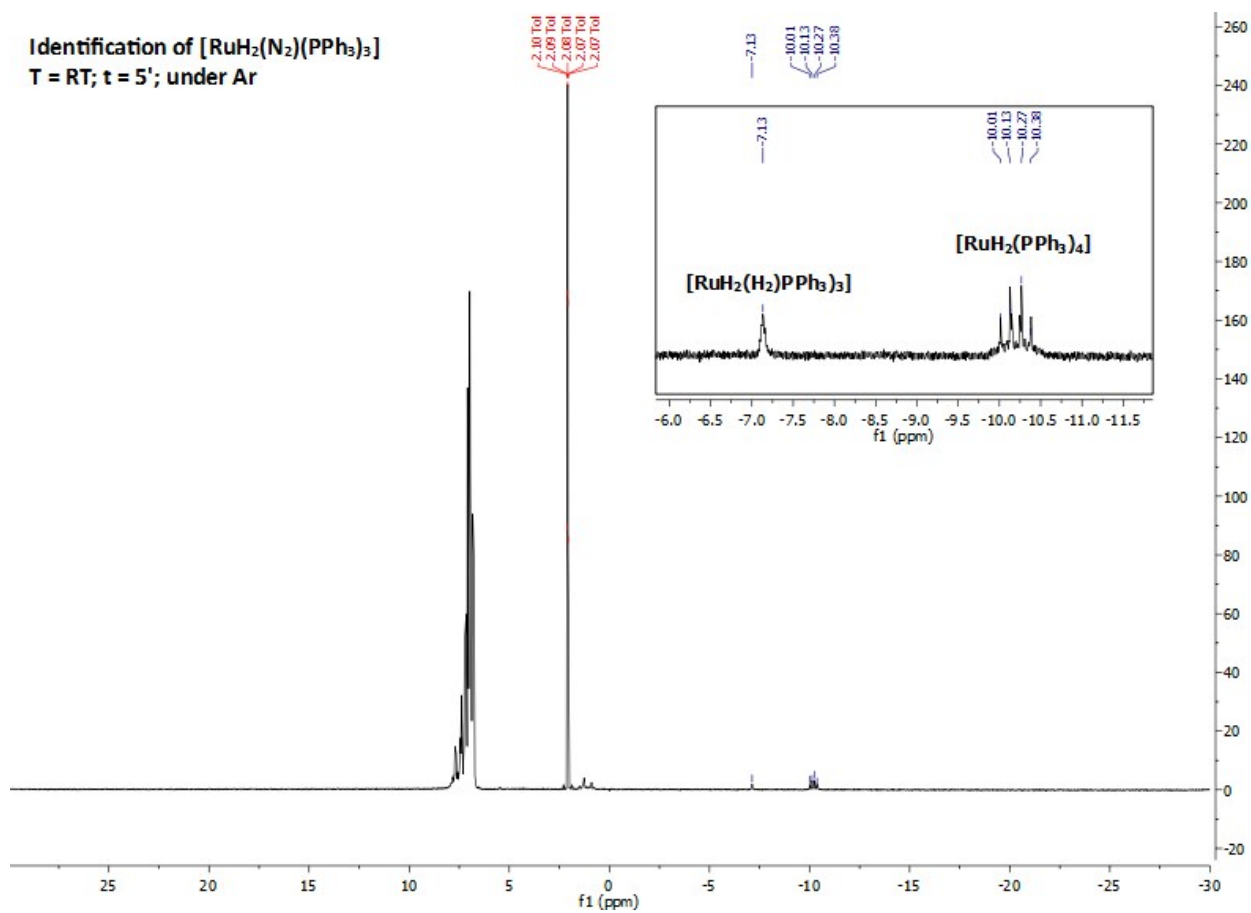

**Figure S27**  $^1\text{H}$  NMR (300 MHz;  $\text{toluene-}d_8$ ); Identification of  $[\text{RuH}_2(\text{N}_2)(\text{PPh}_3)_3]$  by performing the reaction under Ar.

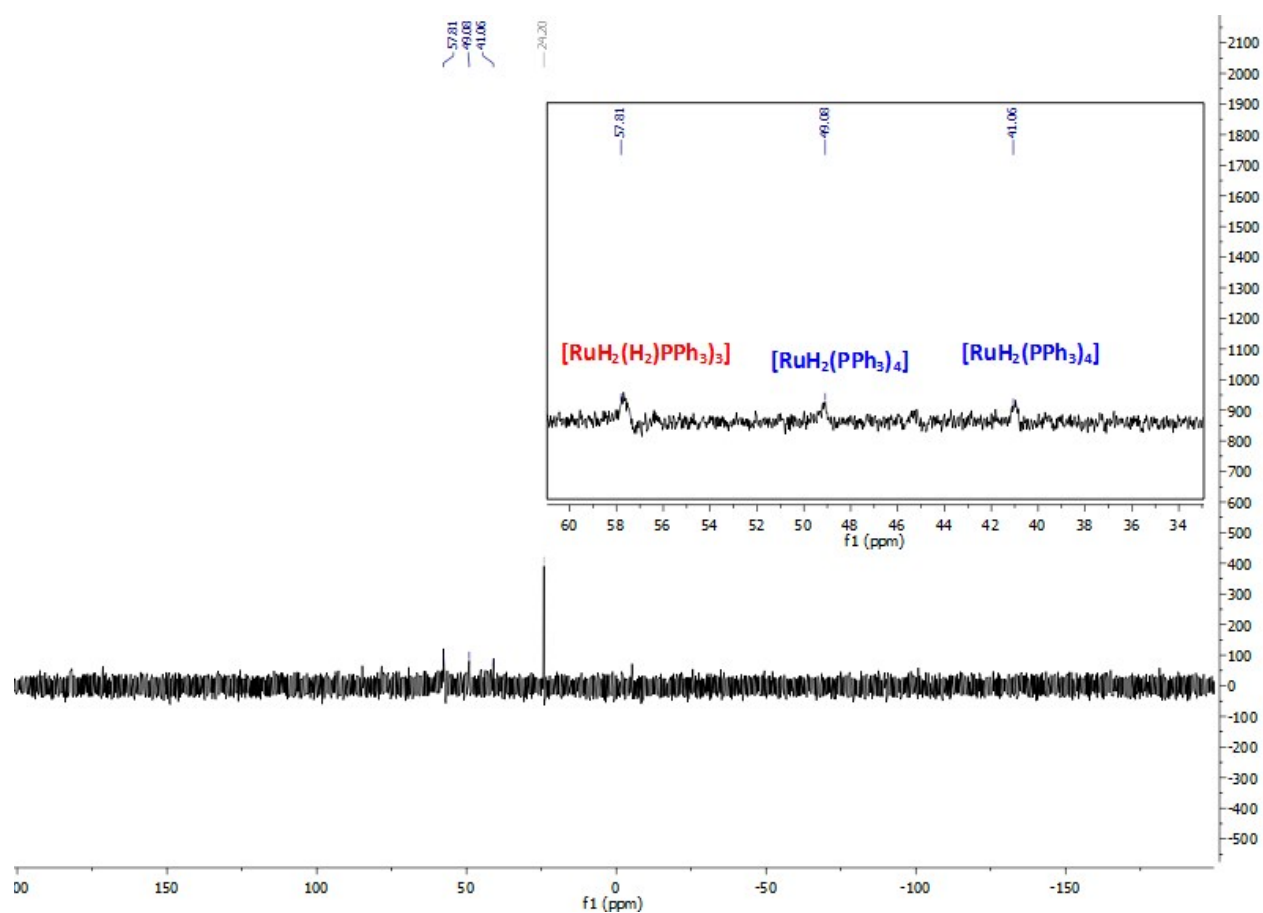

**Figure S28**  $^{31}\text{P}\{^1\text{H}\}$  NMR (300 MHz;  $\text{toluene-}d_8$ ); Identification of  $[\text{RuH}_2(\text{N}_2)(\text{PPh}_3)_3]$  by performing the reaction under Ar.

## 1.10 Identification of $[\text{RuH}_2(\text{PPh}_3)_4]$

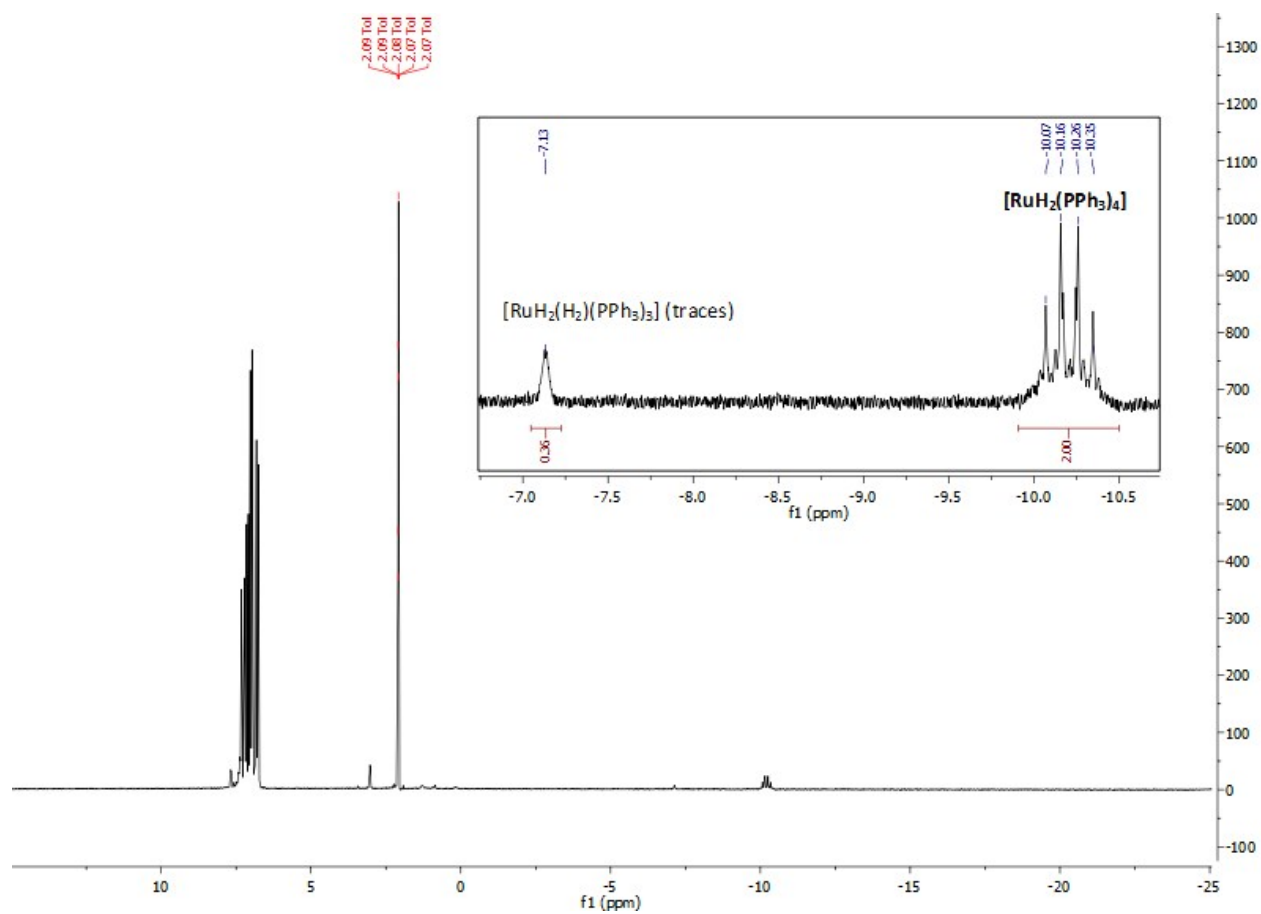

Figure S29  $^1\text{H}$  NMR (400 MHz;  $\text{toluene-}d_8$ ) of  $[\text{RuH}_2(\text{PPh}_3)_4]$

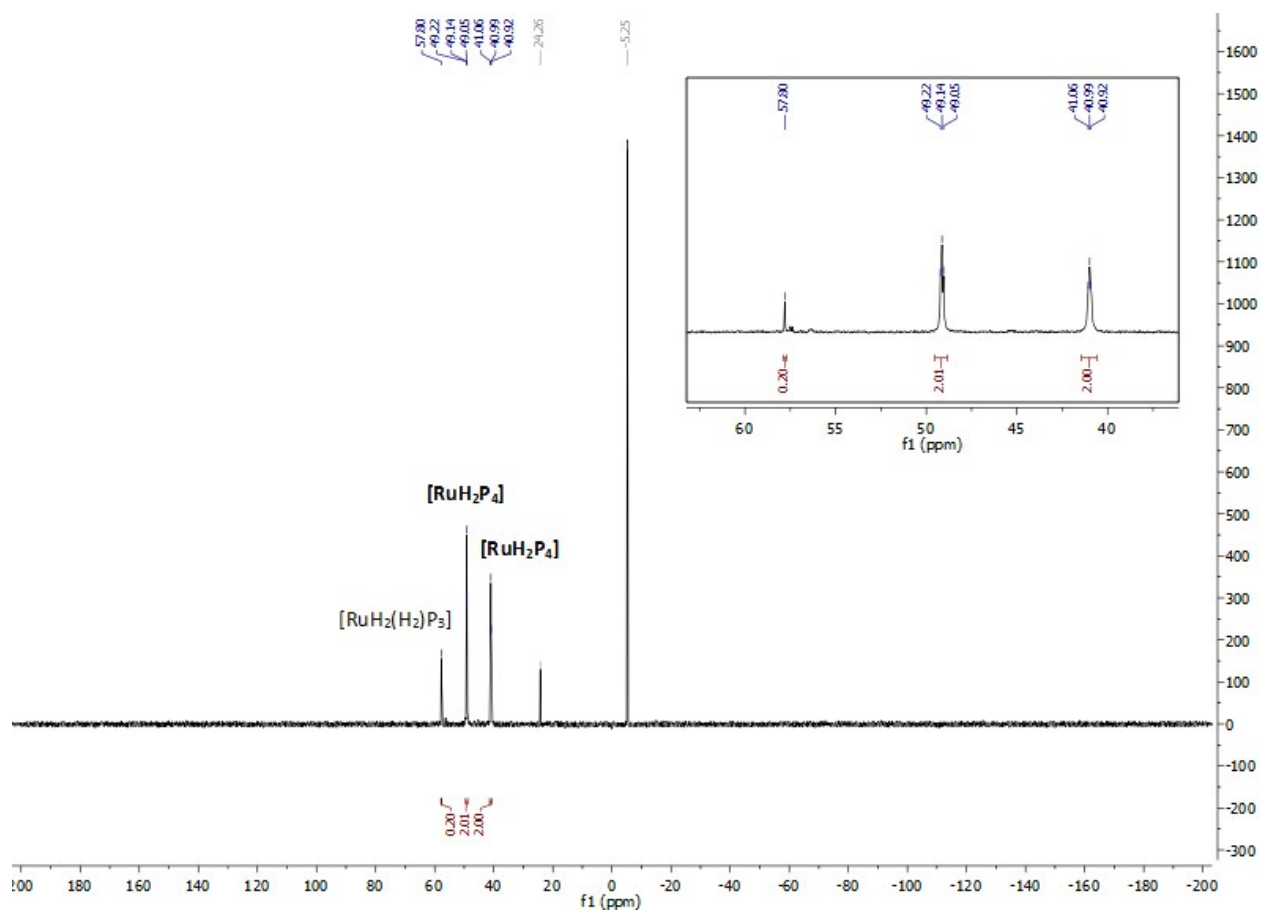

**Figure S30**  $^{31}\text{P}\{^1\text{H}\}$  NMR (400 MHz; toluene- $d_8$ ) of  $[\text{RuH}_2(\text{PPh}_3)_4]$

## 2 Evidence for *o*-D incorporation into coordinated PPh<sub>3</sub>

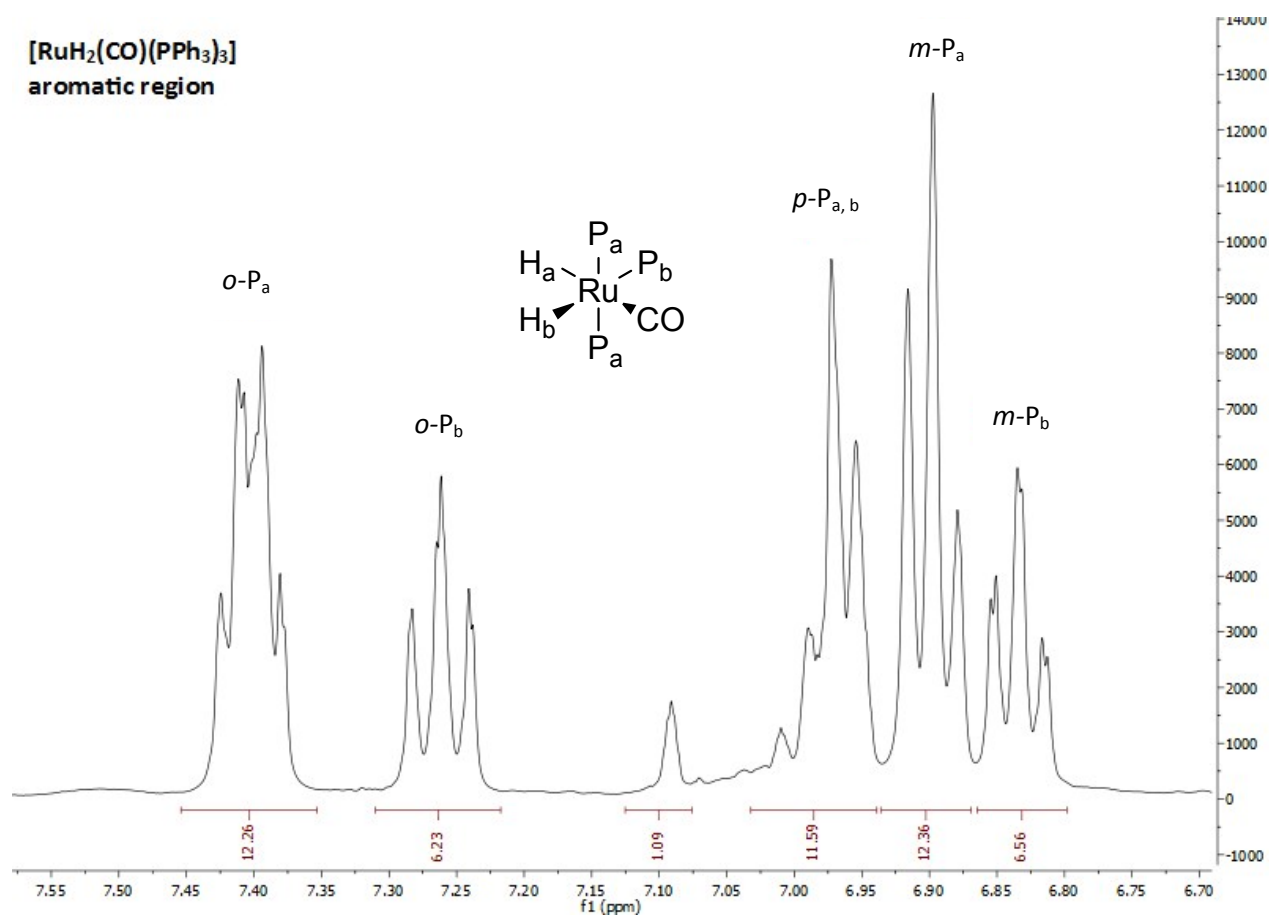

**Figure S31** <sup>1</sup>H NMR (400 MHz; toluene-*d*<sub>8</sub>); aromatic region of [RuH<sub>2</sub>(CO)(PPh<sub>3</sub>)<sub>3</sub>]. The integration of the Ru-H signals was set at 1.0 for each

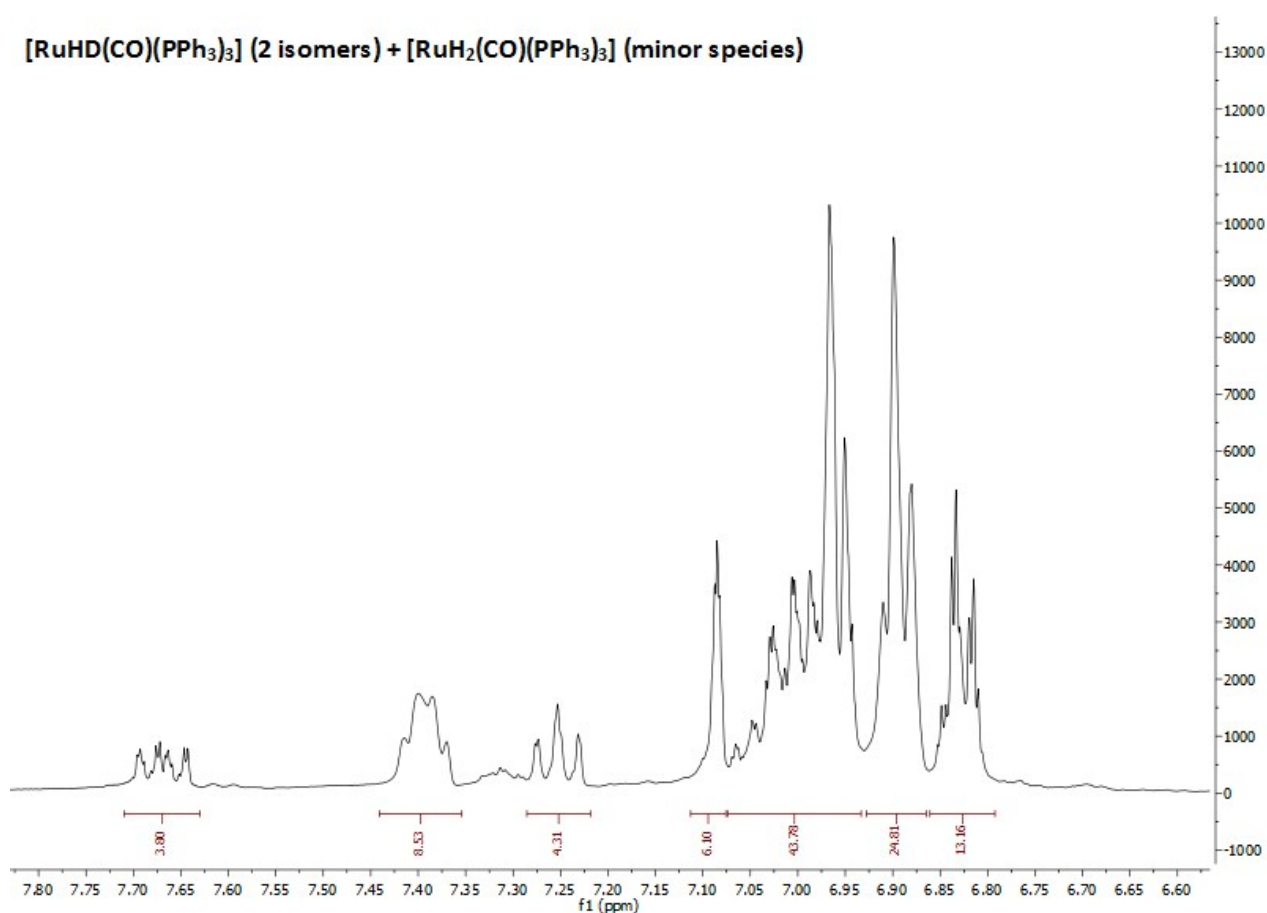

**Figure S32**  $^1\text{H}$  NMR (400 MHz; toluene- $d_8$ ); aromatic region of [RuHD(CO)(PPh<sub>3</sub>)<sub>3</sub>] (2 isomers) and [RuH<sub>2</sub>(CO)(PPh<sub>3</sub>)<sub>3</sub>] (minor species). The Ru-H resonances were of the same intensity, which was set at 1.

The formation of [RuH<sub>4</sub>P'<sub>3</sub>] the reaction of [RuHCIP<sub>3</sub>] and CD<sub>3</sub>OD/Na requires that H/D exchange occurs into the aromatic rings of the coordinated phosphines, as previously observed by Halpern and co-workers. Some evidence that this is occurring is discussed in the main paper with signals being observed in the  $^2\text{H}$  NMR spectrum corresponding to deuteration in the *ortho* positions of both P<sub>a</sub> and P<sub>b</sub>, broadening of the  $^{31}\text{P}$  NMR signals and evidence for incorporation of D into PPh<sub>3</sub> and Ph<sub>3</sub>PO from the  $^{31}\text{P}$  NMR spectra ( $\beta$ -shifted resonances). In order to try to obtain quantitative data on the extent of incorporation, we have analysed the aromatic region of the  $^1\text{H}$  NMR spectra of the final products obtained from the reaction of [RuHCIP<sub>3</sub>] with MeOH/Na and with CD<sub>3</sub>OD/Na. For the reaction using MeOH (Figure S31), the *ortho* and *meta* protons from P<sub>a</sub> and P<sub>b</sub> give well separated signals, whilst the *para* protons resonate in the same place. The *o* and *m* protons do not overlap with signals from PPh<sub>3</sub> or Ph<sub>3</sub>PO, although the *p* protons do.

Looking at the two resonances from the *o* protons, in [RuH<sub>2</sub>(CO)P<sub>3</sub>], the resonances at  $\delta$  7.26 and 7.4 correspond to 6 (P<sub>b</sub>) and 12 (P<sub>a</sub>) protons as expected. When the same product is made from CD<sub>3</sub>OD/Na (Figure S32), the integrations correspond to 2.2 and 4.3 protons showing that very substantial D has been incorporated into the *o*-positions. (11 - 12 D per molecule). Further qualitative evidence for incorporation of D into the *o* positions of the phenyl rings comes from the fine structure of the resonances from the *m* protons on P<sub>b</sub>, which is absent from the related resonance in Figures S31 and arises from H<sub>*m*</sub>-D<sub>*o*</sub> coupling. The incorporation of D into the *ortho* positions is far in excess of the 4 that would be required to give 4 non-deuterated hydrides. We conclude that fast H-D exchange occurs with the solvent in some intermediates along with loss of HD/H<sub>2</sub> or that D can be incorporated directly into the ligand from the solvent.



This H/D exchange must occur during the conversion of  $[\text{RuHClP}_3]$  to  $[\text{RuH}_4\text{P}'_4]$  but the final product of this first step certainly only contains Ru-H. This is best seen from the hydride resonances of  $[\text{RuH}_2(\text{N}_2)\text{P}_3]$ , which very clearly shows the H-H coupling of the dihydride with no enhancement of the low frequency peaks. The  $[\text{RuH}_2\text{P}_4]$  hydride resonance is second order (AA'MM'XX') and is identical whether the reaction is carried out in  $\text{CH}_3\text{OH}$  or  $\text{CD}_3\text{OD}$ .  $[\text{RuHDP}_4]$  would be expected to show a first order resonance approaching a doublet of quartets.

### 3 Hydride composition for the final product from reaction of $[\text{RuHClP}_3]$ with $\text{Na}/\text{CD}_3\text{OD}$

Figure S 31 shows the integrated phenyl region of a final product  $[\text{RuH}_2(\text{CO})\text{P}_3]$  obtained using  $[\text{RuHClP}_3]$  and  $\text{Na}/\text{CH}_3\text{OH}$  with each hydride signal set to have an integrated intensity of 1.0. Figure S32 is from a similar final product when using  $\text{Na}/\text{CD}_3\text{OD}$  once again with the equal intensity hydride resonances set at 1.0. These hydride resonances, which are shown in Figure S3 arise from the two isomers of  $[\text{RuHD}(\text{CO})\text{P}'_3]$  together with some  $[\text{RuH}_2(\text{CO})\text{P}'_3]$ .

We then analyse the integrations of the *meta* H atoms on the phenyl rings since they are distinct, free from interference by  $\text{OPPh}_3$  and should not have experienced any H/D exchange. For the non-deuterated sample (Figure S31) the *m* resonances from  $\text{P}_a$  and  $\text{P}_b$  integrate as 12.36 and 6.56 corresponding to 12 and 6 protons respectively. The similar integration for the deuterated sample (Figure S32) gives  $\text{P}_a$  24.81 and  $\text{P}_b$  12.86, almost exactly double what is seen for the undeuterated sample. This means that there is on average 1 H and 1 D on each ruthenium and hence that the amount of  $[\text{RuH}_2(\text{CO})\text{P}'_3]$  and of  $[\text{RuD}_2(\text{CO})\text{P}'_3]$  must be the same.

By integrating the individual peaks for each hydride signal in Figure S3, it is possible to work out the ratio of the two isomers of  $[\text{RuHD}(\text{CO})\text{P}'_3]$  (each 1.27) to  $[\text{RuH}_2(\text{CO})\text{P}'_3]$  (1). Since  $[\text{RuD}_2(\text{CO})\text{P}'_3]$  must also be present in the same amount as  $[\text{RuH}_2(\text{CO})\text{P}'_3]$ . We can simulate the observed integrations if the proportions of  $[\text{RuH}_2(\text{CO})\text{P}'_2] : [\text{RuHD}(\text{CO})\text{P}'_3] \text{ (each isomer)} : [\text{RuD}_2(\text{CO})\text{P}'_3]$  is 0.22: 0.28 : 0.28 : 0.22.
